# Supplementary material
Source: MDPI journal article supplement (https://www.mdpi.com/2073-4395/14/5/993)
Supplement: s1 [file s1]

# Appropriate Application of Organic Fertilizer Can Effectively Improve Soil Environment and Increase Maize Yield in Loess Plateau

Yingying Xing, Yuan Li, Fan Zhang and Xiukang Wang \*

Key Laboratory of Applied Ecology of Loess Plateau, College of Life Sciences, Yan'an University, Yan'an 716000, China; xingyingying610624@yau.edu.cn (Y.X.); today4560@163.com (Y.L.); zhangfan9264@163.com (F.Z.)

\* Correspondence: wangxiukang@yau.edu.cn; Tel.: +86-9112332030

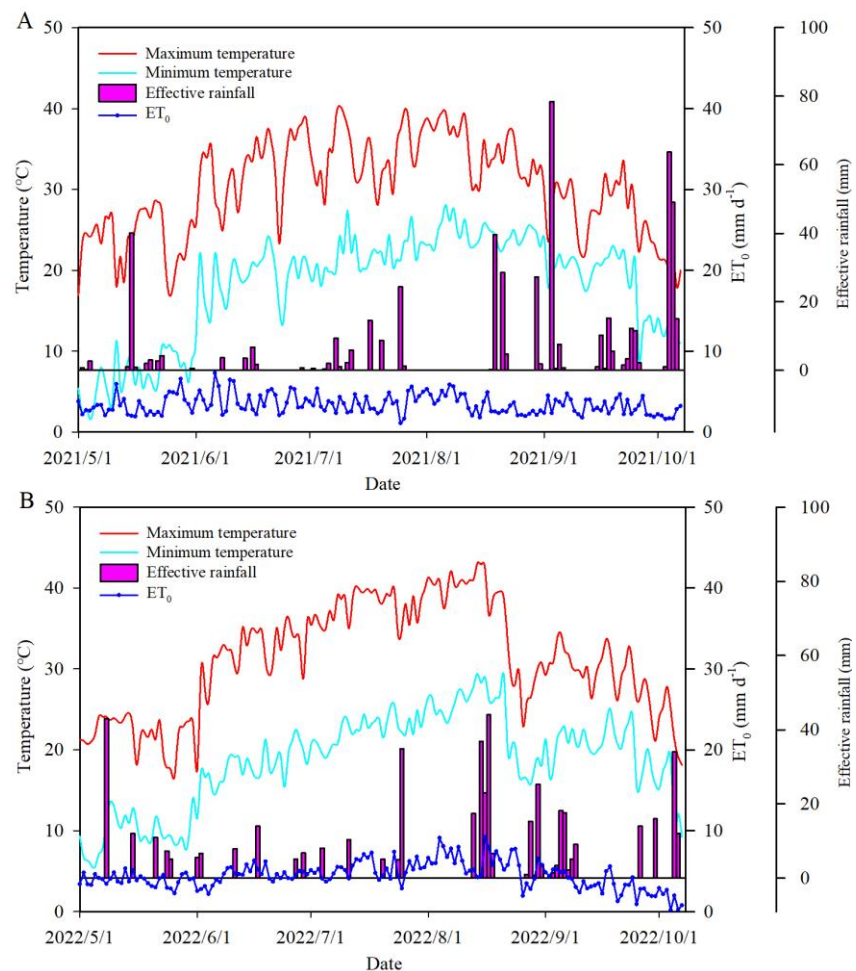

**Figure S1.** Main meteorological data of maize during the two-year growing period.

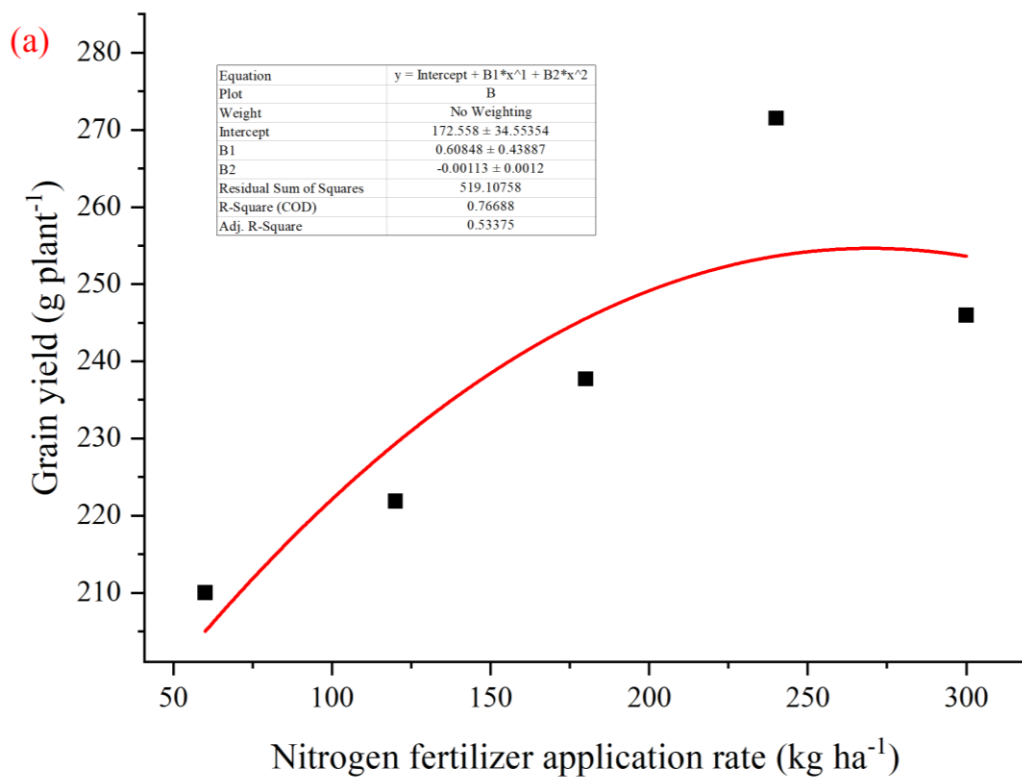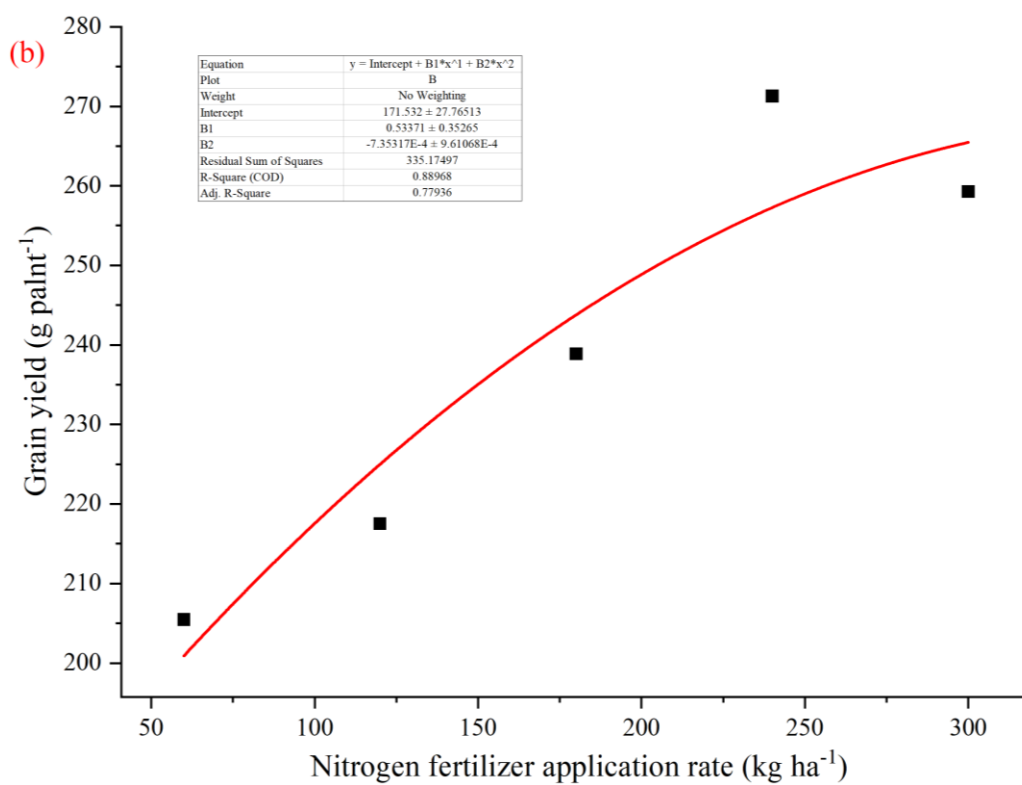

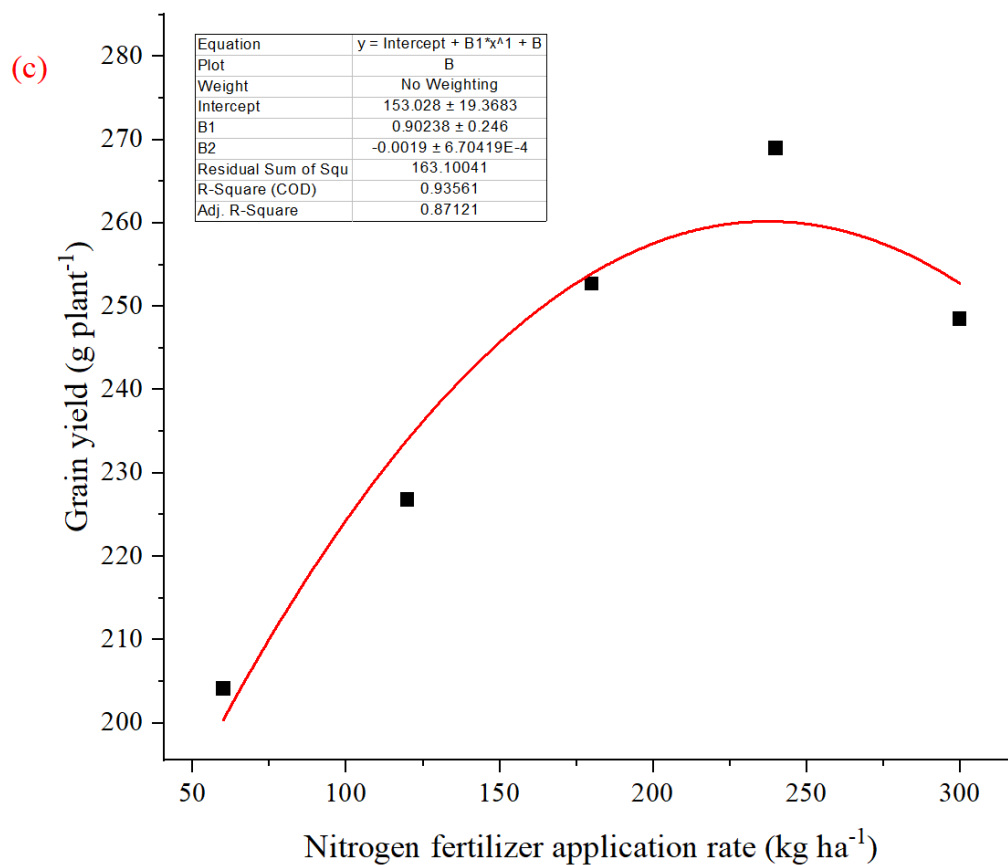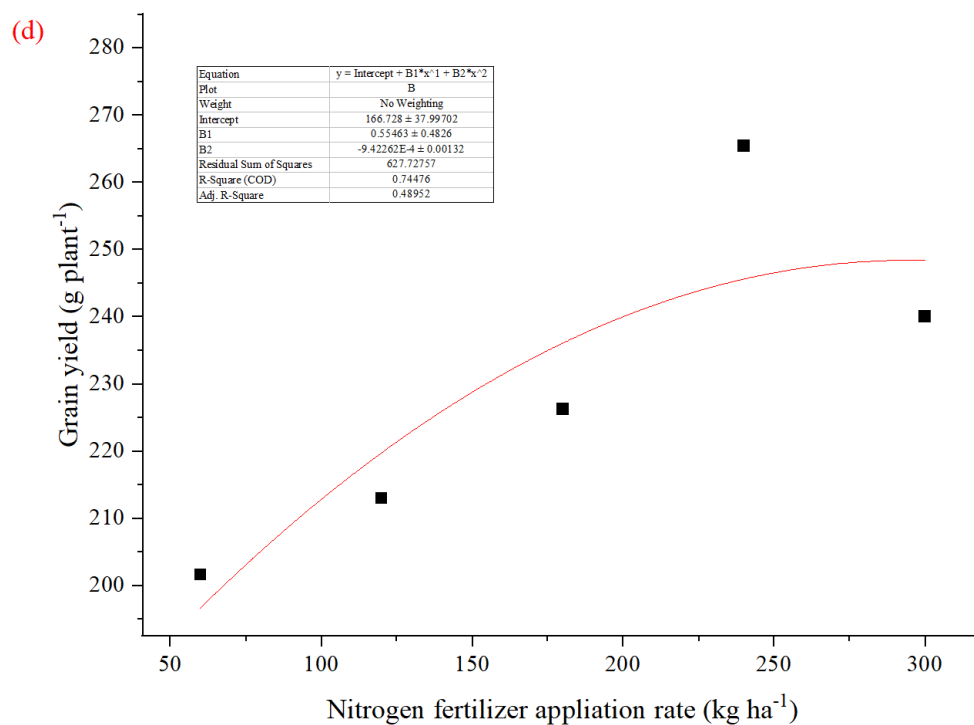

**Figure S2.** The relationship between maize grain yield and N fertilizer application rate in 2021 (a, chemical fertilizer and b, organic fertilizer) and 2022 (c, chemical fertilizer and d, organic fertilizer).

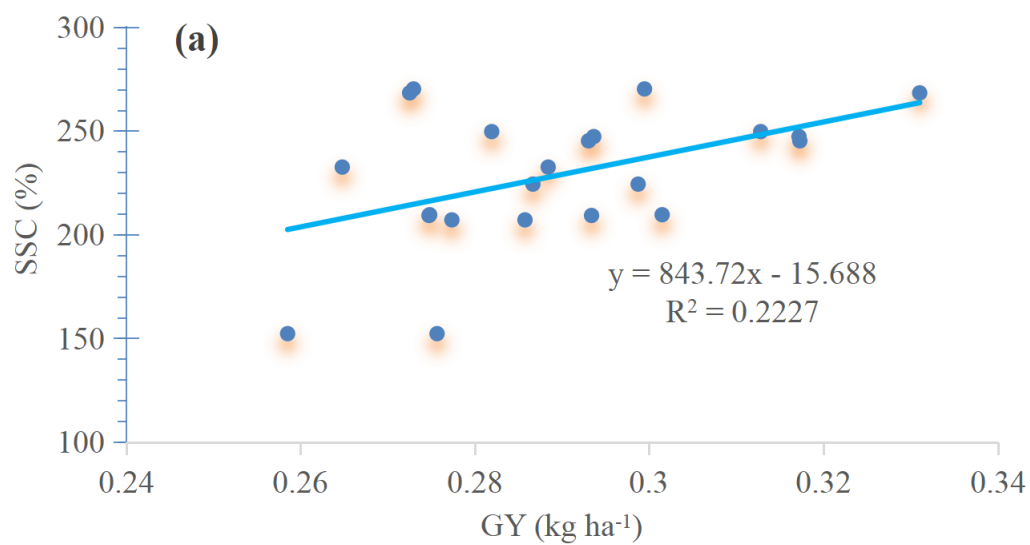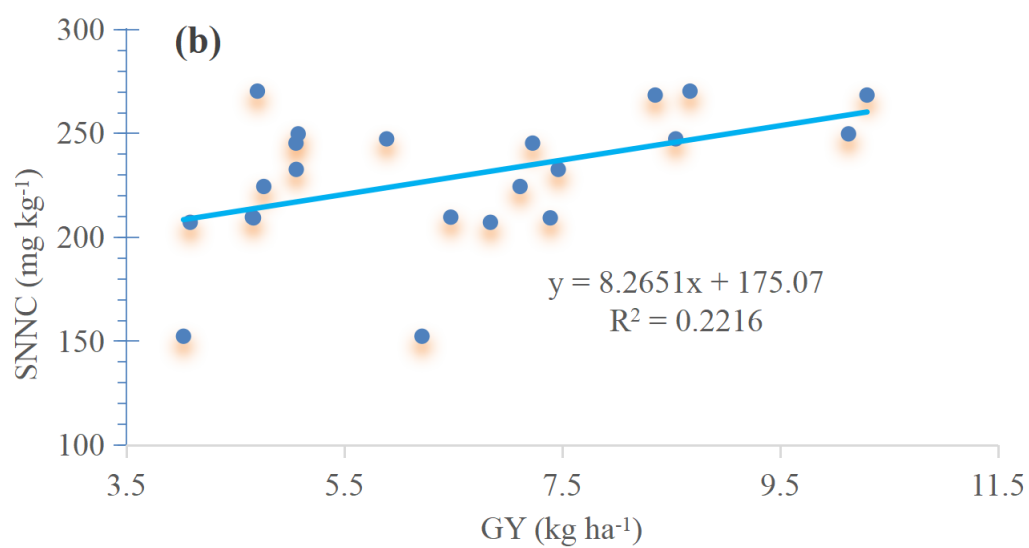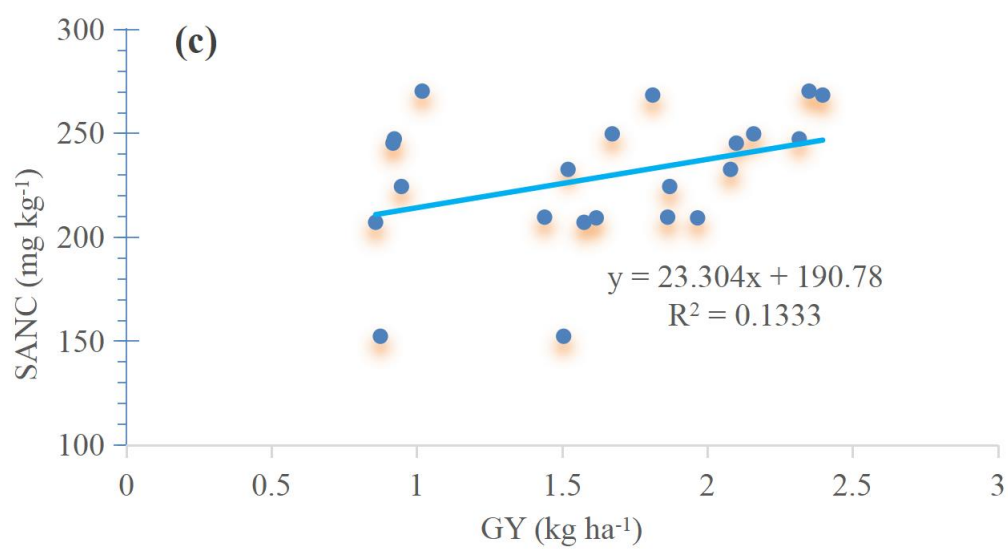

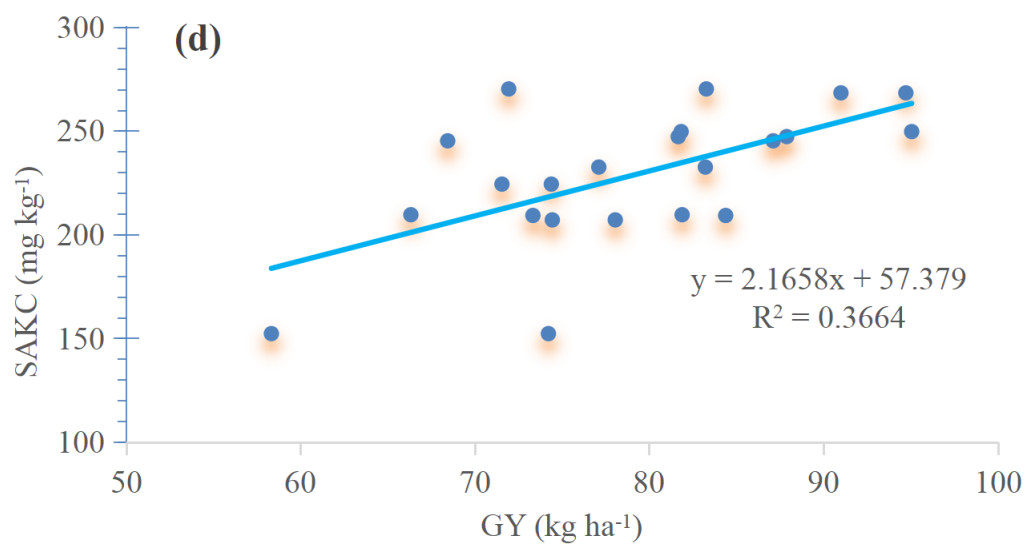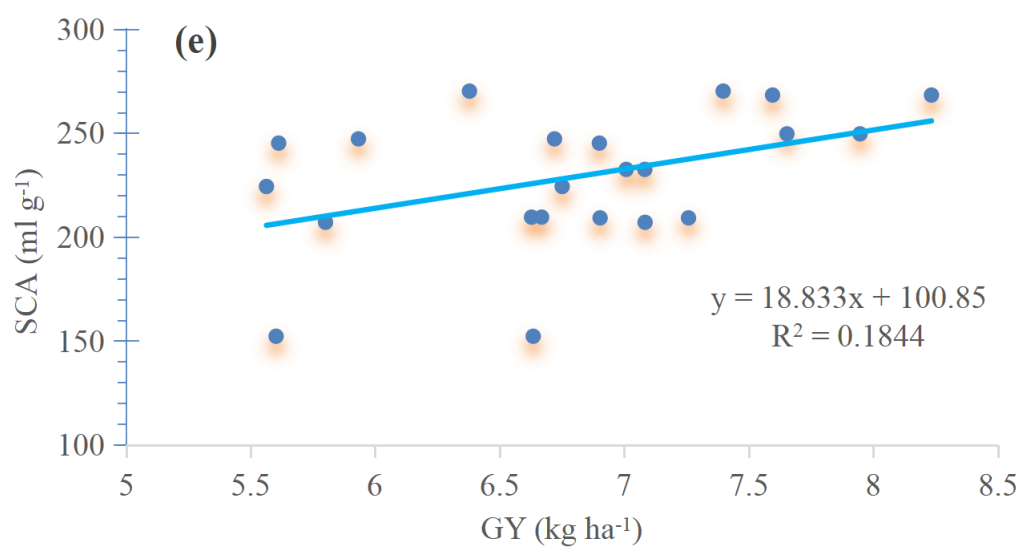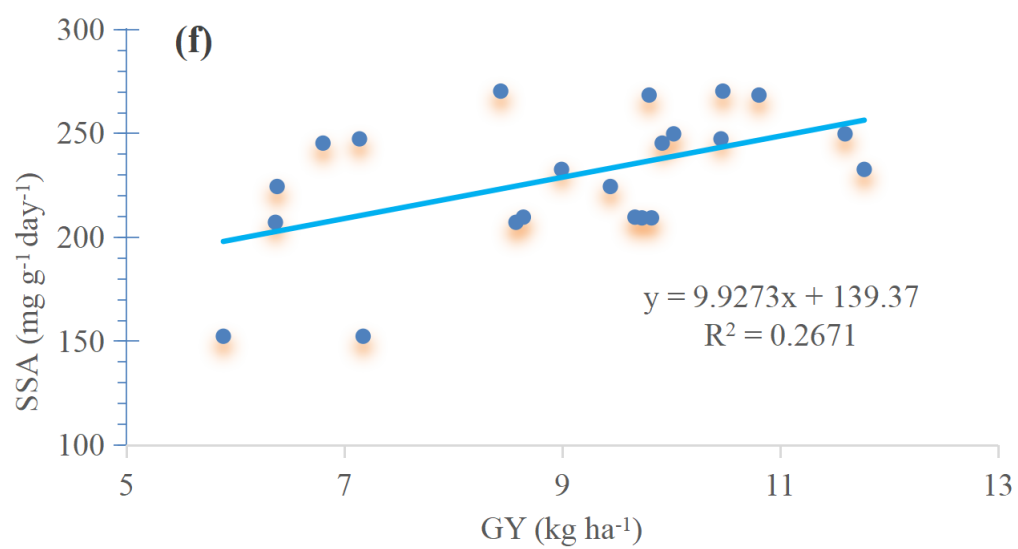

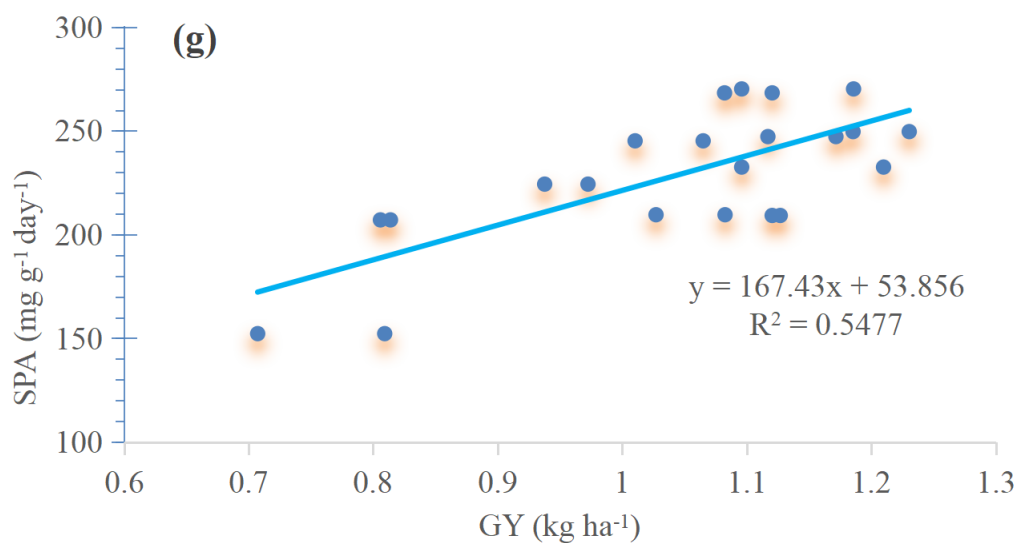

**Figure S3.** The relationship between maize grain yield (GY) and soil salt content (SSC, a), soil nitrate nitrogen content (SNNC, b), soil alkali-hydrolyzed nitrogen (SANC, c), soil available potassium content (SAKC, d), soil catalase activity (SCA, e), soil sucrase activity (SSA, f), and soil phosphatase activity (SPA, g).

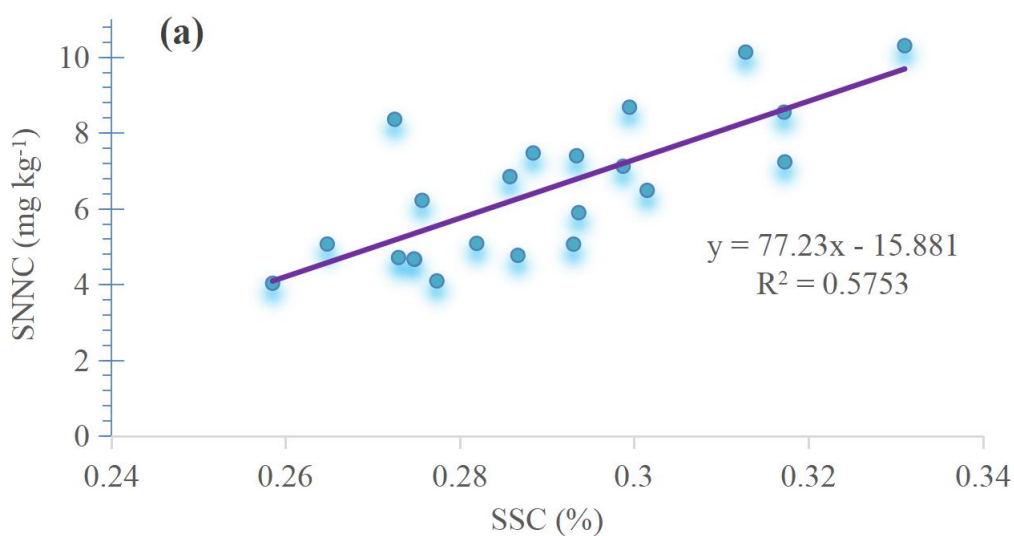

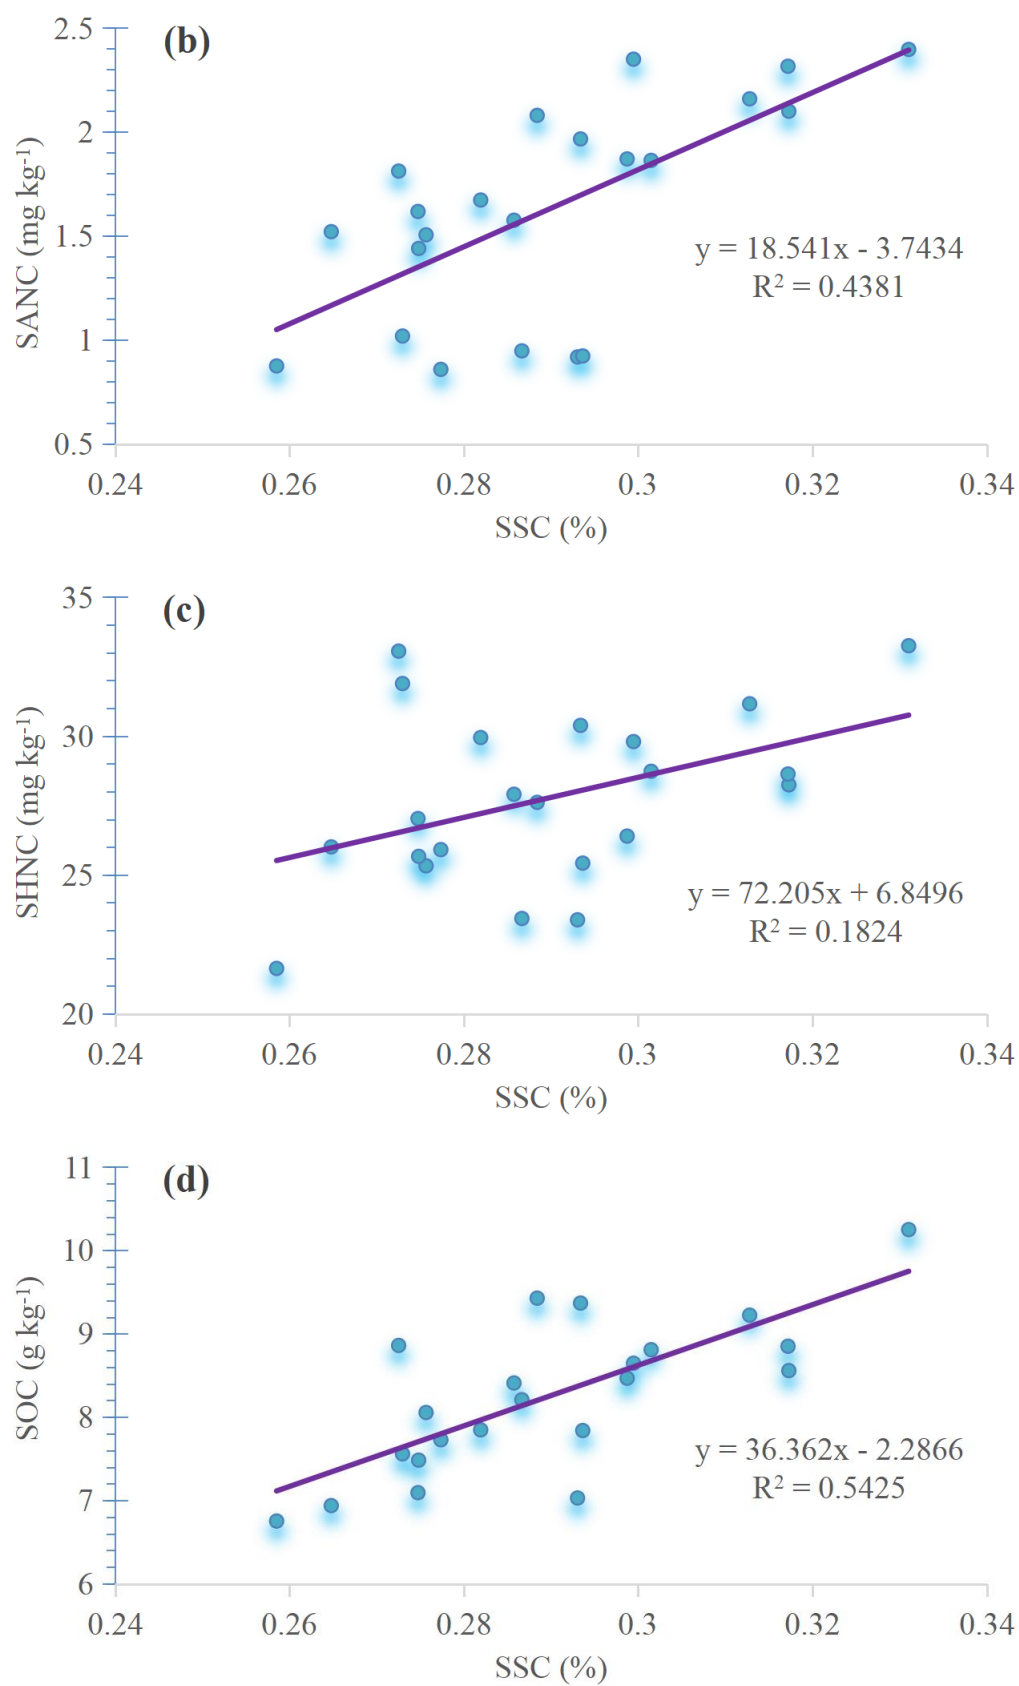

**Figure S4.** The relationship between soil salt content (SSC) and soil nitrate nitrogen content (SNNC, a), soil ammonium nitrogen content

(SANC, b), soil alkali-hydrolyzed nitrogen content (SHNC, c) and soil organic matter content (SOC, d).

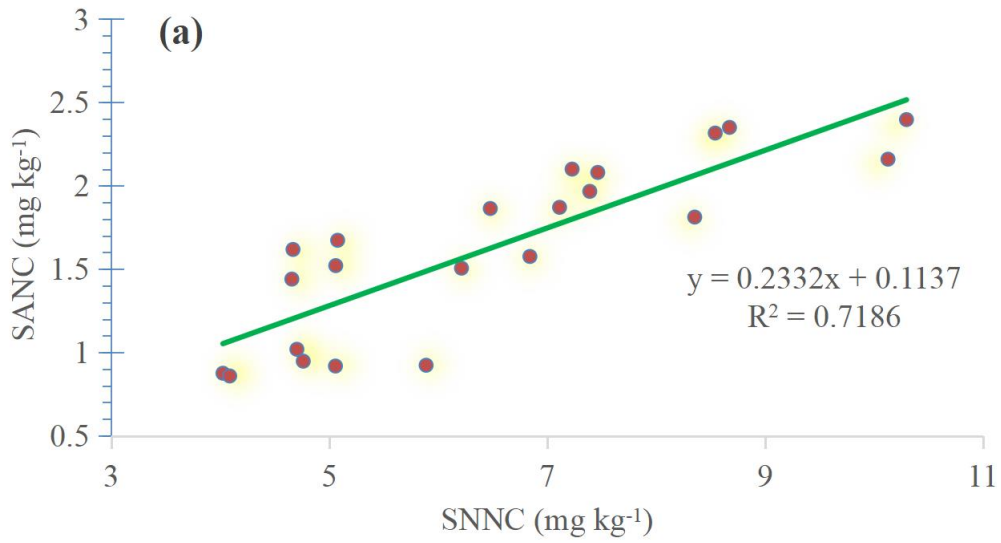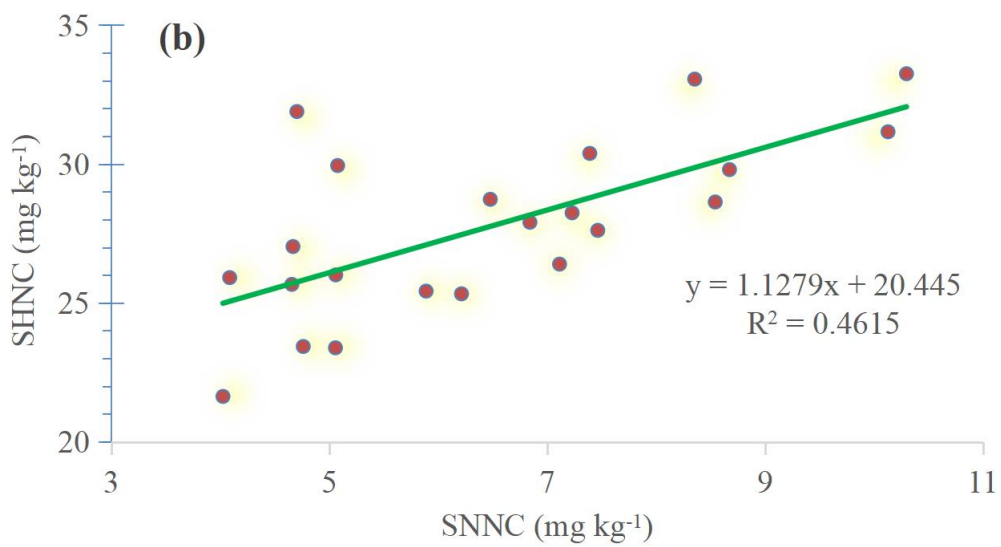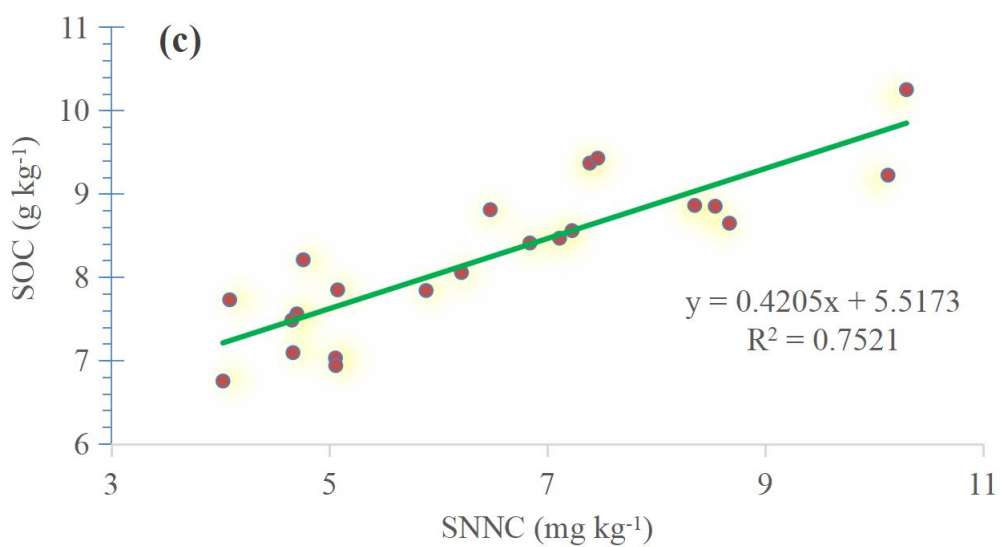



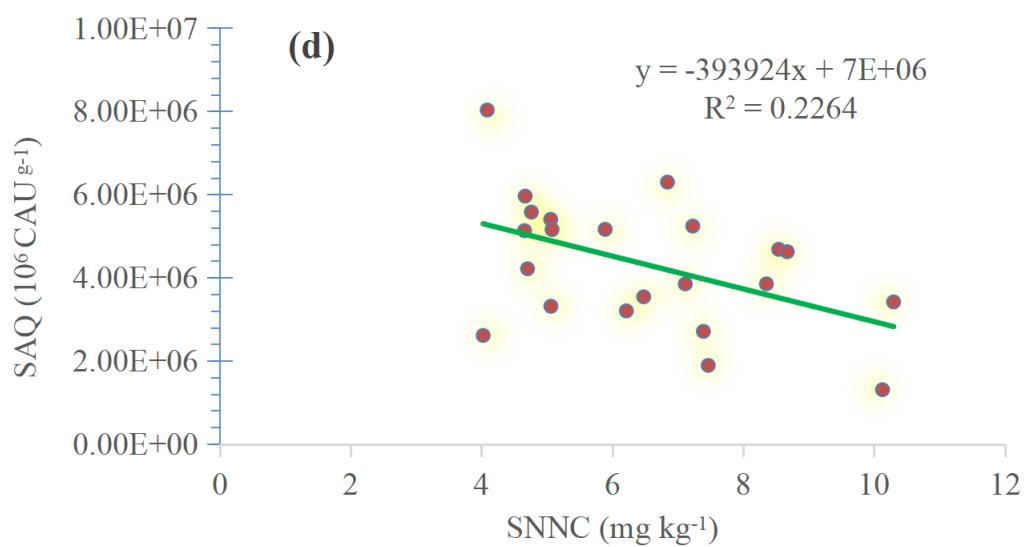

**Figure S5.** The relationship between soil nitrate nitrogen content (SNNC) and soil ammonium nitrogen content (SANC, a), soil alkali-hydrolyzed nitrogen content (SHNC, b), soil organic matter content (SOC, c) and soil actinomyces quantity (SAQ, d).

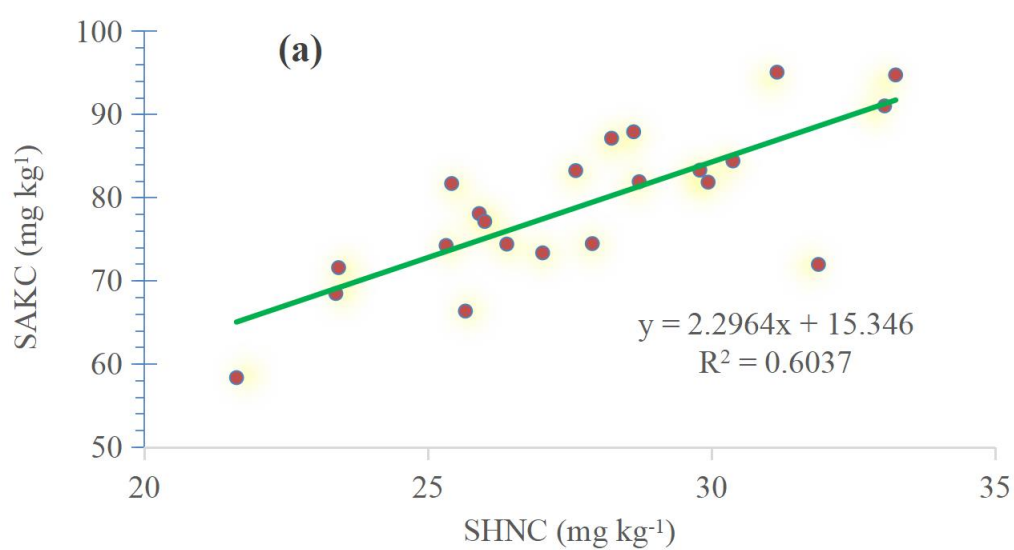

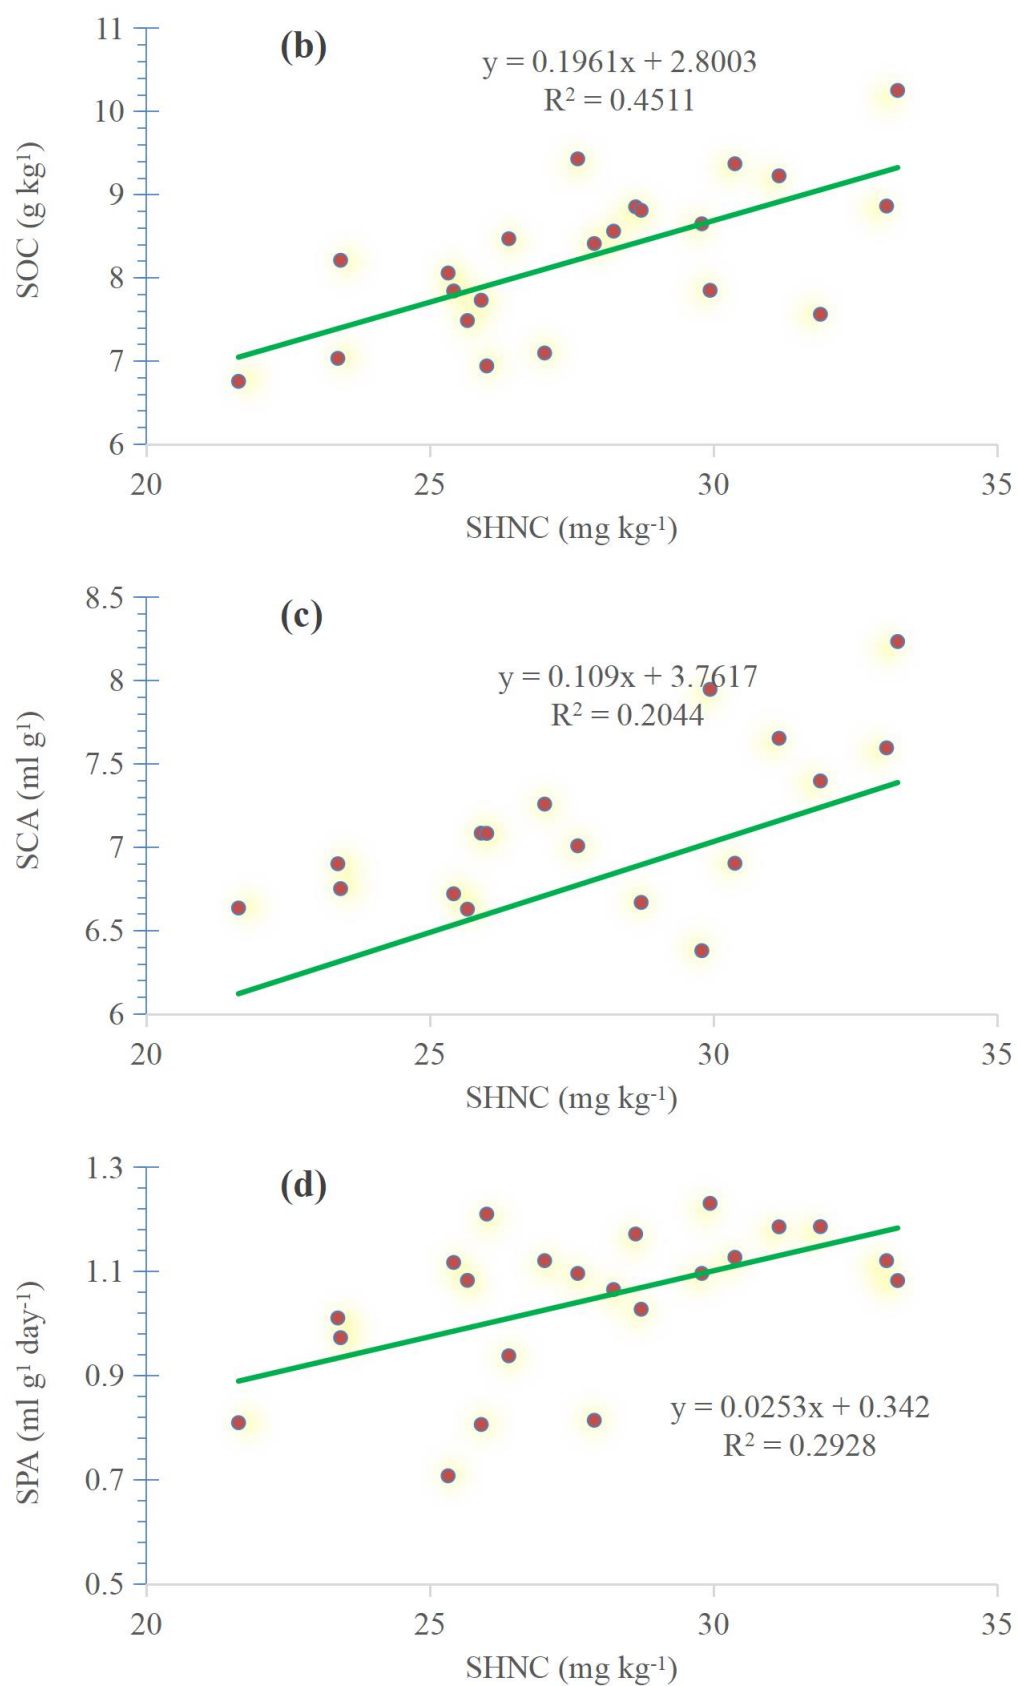

**Figure S6.** The relationship between soil alkali-hydrolyzed nitrogen content (SHNC) and soil available potassium content (SAKC, a), soil organic matter content (SOC, b), soil catalase activity (SCA, c), and soil

phosphatase activity (SPA, d).

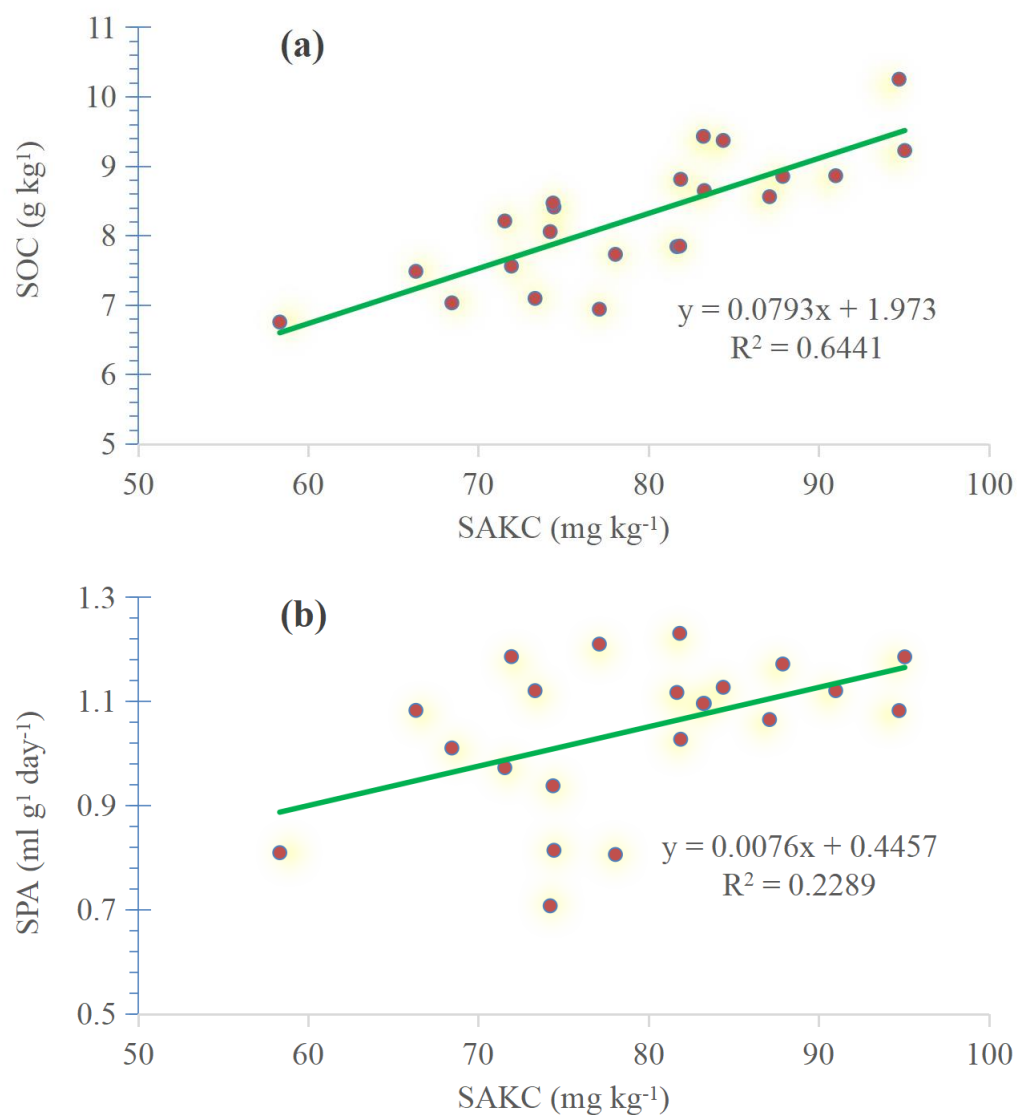

**Figure S7.** The relationship between and soil available potassium content (SAKC) and soil organic matter content (SOC, a) and soil phosphatase activity (SPA, b).

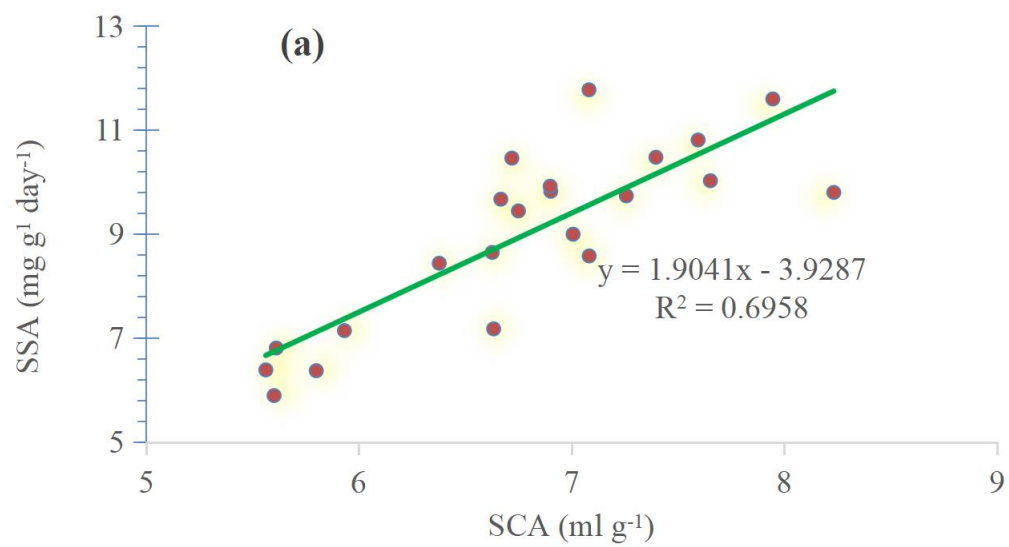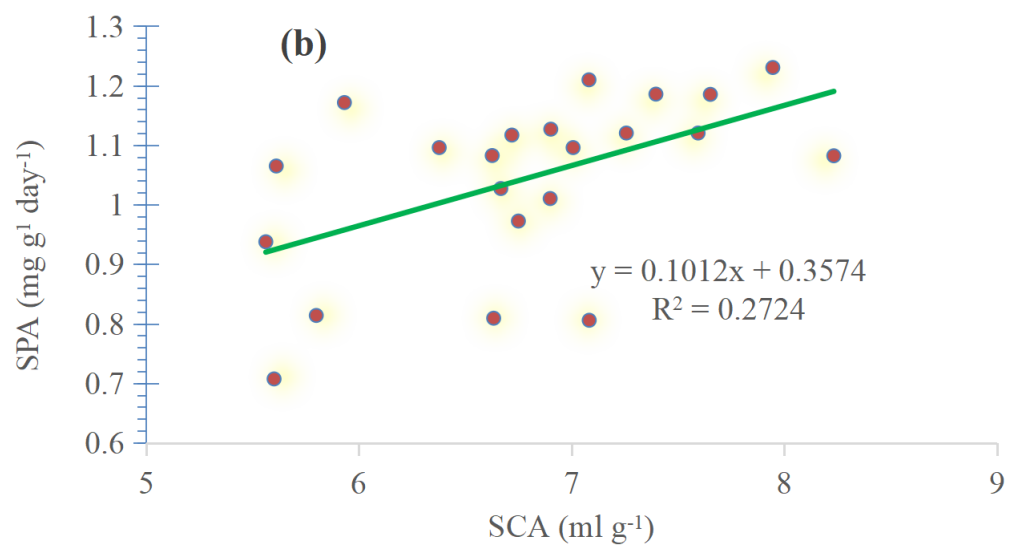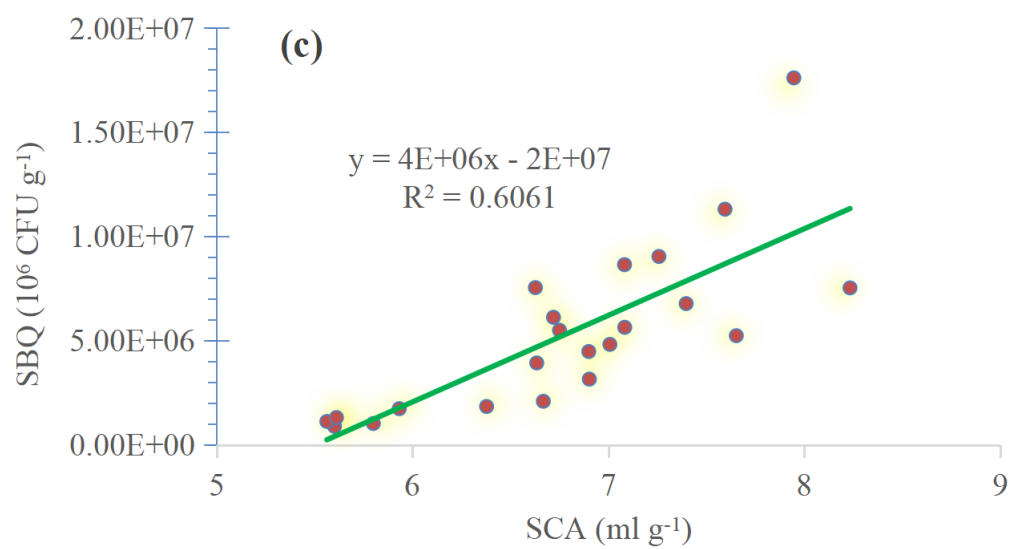

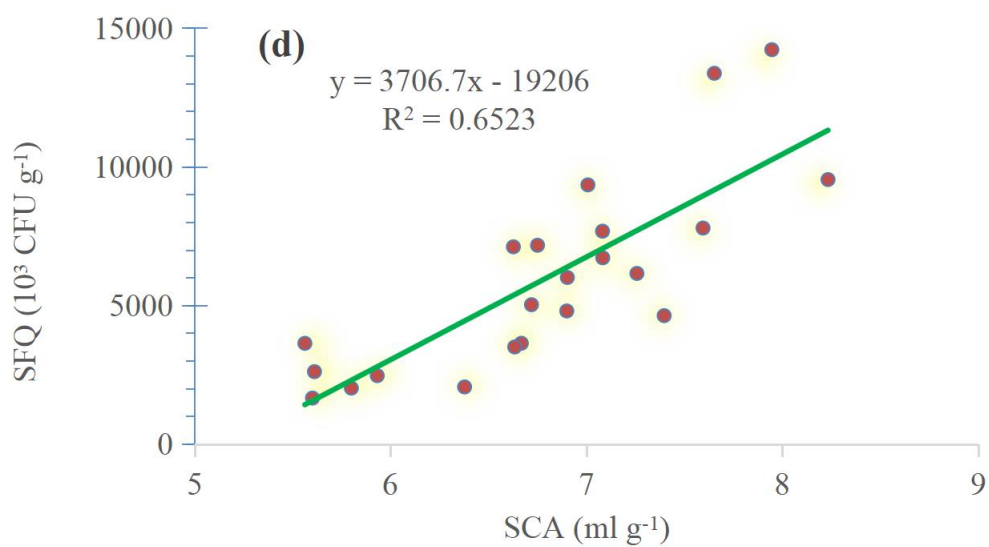

**Figure S8.** The relationship between and soil catalase activity (SCA) and soil sucrase activity (SSA, a), soil phosphatase activity (SPA, b), soil bacteria quantity (SBQ, c), and soil fungi quantity (SFQ, d).

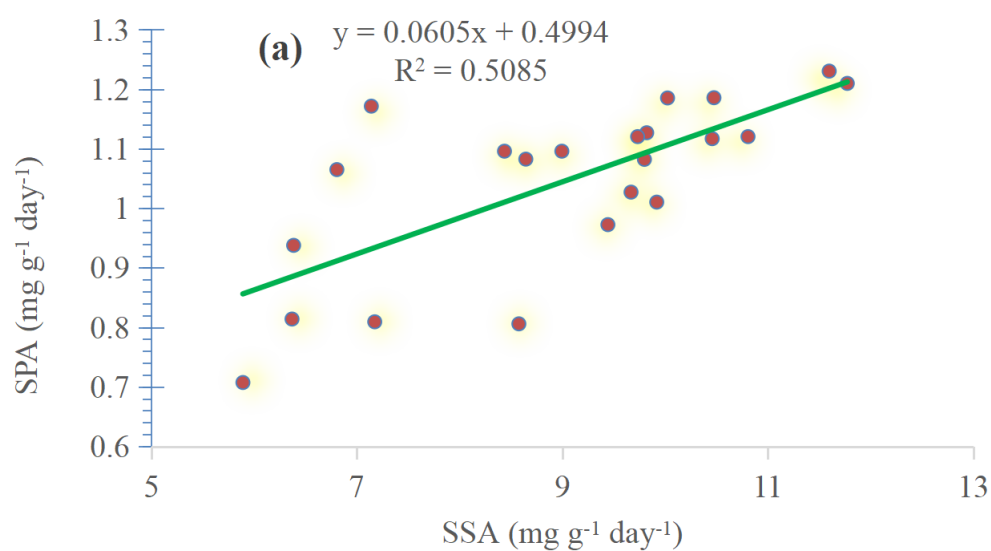

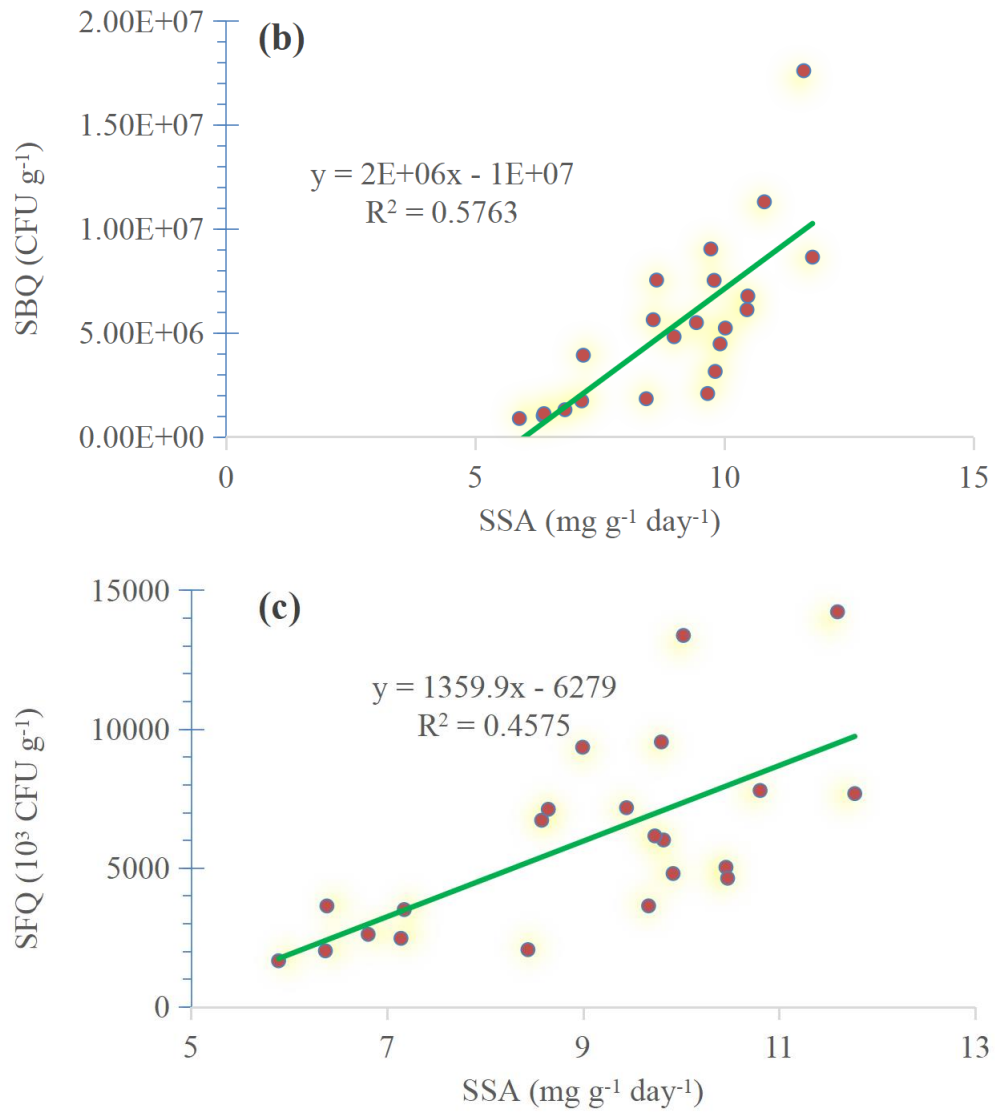

**Figure S9.** The relationship between and soil sucrose activity (SSA) and soil phosphatase activity (SPA, a), soil bacteria quantity (SBQ, b) and soil fungi quantity (SFQ, c).

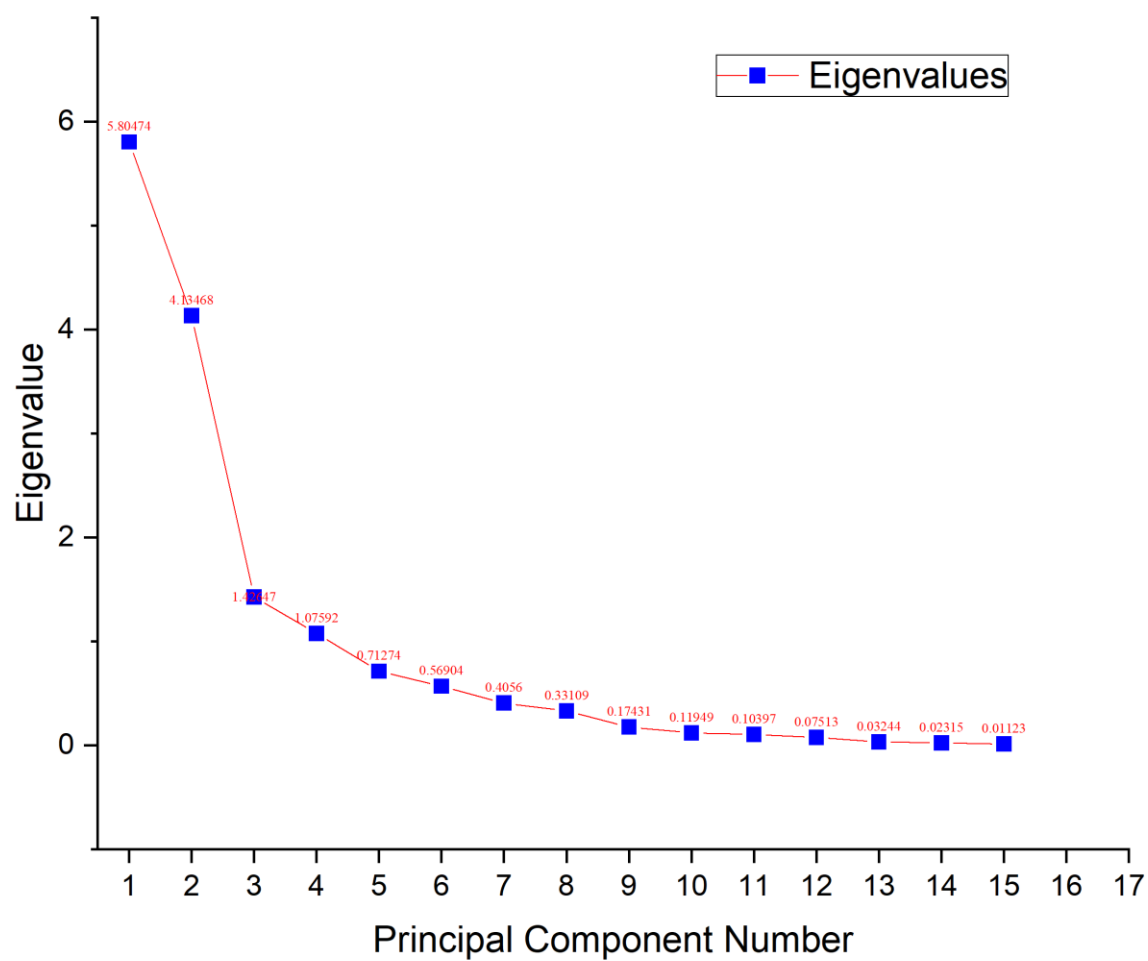

**Figure S10.** The number of components advocated by principal component analysis.

**Table S1.** The plant height was affected by fertilizer type and fertilizer application rate in 2021 and 2022.

| Treatment | Seedling stage |             | Jointing stage |               | Filling stage |                 | Maturing stage |                 |
|-----------|----------------|-------------|----------------|---------------|---------------|-----------------|----------------|-----------------|
|           | 2021           | 2022        | 2021           | 2022          | 2021          | 2022            | 2021           | 2022            |
| CK        | 26.77±3.06a    | 25.47±4.12a | 209.03±3.75e   | 198.53±5.47b  | 284.6±0.79b   | 271.33±3.13c    | 232.37±17.3b   | 211.32±5.17c    |
| N1        | 26.03±5.96a    | 26.73±4.91a | 220.07±5.23de  | 218.57±7.91a  | 310.13±5.71a  | 294.33±14.02bc  | 278.17±13.48ab | 275.7±10.76ab   |
| N2        | 33.8±1.6a      | 29±4.06a    | 239.93±4.07bc  | 238.43±4.53a  | 319.53±1.83a  | 307.83±5.39ab   | 301.3±21.77a   | 272.67±3.79ab   |
| N3        | 30.2±2.43a     | 31.7±0.56a  | 265.43±7.52a   | 263.93±9.4a   | 313.23±9.39a  | 295.87±6.94abc  | 263.93±24.44ab | 293.58±4.32a    |
| N4        | 28.3±3.96a     | 34.5±0.82a  | 242.03±6.63bc  | 240.53±8.53a  | 309.4±3.92ab  | 310.87±9.49ab   | 257.8±34.24ab  | 290.88±14.21a   |
| N5        | 32±1.68a       | 30.9±2.21a  | 256.9±8.3ab    | 253.4±6.47a   | 301.2±14.04ab | 313.17±7.85a    | 271.4±14.21ab  | 258.41±6.32abc  |
| TN1       | 25.2±3.46a     | 24.2±3.46a  | 227.8±1.65cd   | 226.3±4.2a    | 295.6±16.42ab | 308.87±4.2ab    | 275.8±8.23ab   | 278.49±9.74ab   |
| TN2       | 32.97±1.88a    | 32.97±1.88a | 228.07±2.15cd  | 222.57±4.83a  | 309.1±3.3ab   | 314.27±2.2a     | 292.03±9.69a   | 290.27±13.21a   |
| TN3       | 29.37±2.03a    | 29.37±2.03a | 242.37±22.65cd | 240.87±24.05a | 297.13±9.24ab | 311.97±11.58ab  | 289.33±18.74a  | 286.82±35.73ab  |
| TN4       | 27.47±3.88a    | 27.47±3.88a | 245.1±3.41abc  | 243.6±2.56a   | 312.13±10.83a | 308.13±1.8ab    | 259.43±9.88ab  | 257.14±16.03abc |
| TN5       | 31.17±1.37a    | 31.17±1.37a | 232.4±4.77cd   | 230.9±5.12a   | 319.43±9.32a  | 299.93±12.55abc | 270.57±17.52ab | 244.23±15.45bc  |



**Table S2.** The plant stem diameter was affected by fertilizer type and fertilizer application rate in 2021 and 2022.

| Treatment | Seedling stage |            | Jointing stage |             | Filling stage |             | Maturing stage |             |
|-----------|----------------|------------|----------------|-------------|---------------|-------------|----------------|-------------|
|           | 2021           | 2022       | 2021           | 2022        | 2021          | 2022        | 2021           | 2022        |
| CK        | 4.89±1.07a     | 5.18±1.14a | 22.87±0.51a    | 23.13±0.51a | 19.3±0.76a    | 19.3±0.76a  | 17.16±0.77a    | 17.14±0.29a |
| N1        | 6.35±0.72a     | 6.63±0.54a | 24.03±0.9a     | 24.29±0.92a | 24.04±2.36a   | 23.9±2.33a  | 21.4±2.28a     | 21.37±2.11a |
| N2        | 5.16±0.81a     | 5.45±0.95a | 27.27±1.47a    | 27.53±1.55a | 25.19±3.54a   | 25.05±3.55a | 23.92±0.93a    | 23.9±0.96a  |
| N3        | 5.96±0.36a     | 6.21±0.23a | 28.6±3.49a     | 26.86±3.58a | 25.73±0.57a   | 23.58±0.59a | 21.78±2.86a    | 22.76±2.84a |
| N4        | 6.15±1.48a     | 6.43±1.48a | 25.18±1.77a    | 25.44±1.86a | 24.48±0.54a   | 24.33±0.51a | 23.93±1.52a    | 22.9±1.43a  |
| N5        | 6.11±1.57a     | 6.4±1.75a  | 27.13±0.89a    | 24.49±0.8a  | 24.67±2.17a   | 23.53±2.2a  | 23.52±2.01a    | 23.5±2.18a  |
| TN1       | 6.25±0.35a     | 6.34±0.17a | 25.27±1.2a     | 25.53±1.29a | 26.1±0.55a    | 25.96±0.57a | 20.72±0.35a    | 20.7±0.52a  |
| TN2       | 5.07±1.16a     | 5.35±1.31a | 25.03±1.96a    | 24.29±2.04a | 24.24±0.99a   | 24.1±1.01a  | 21.71±1.69a    | 22.69±1.67a |
| TN3       | 5.86±0.1a      | 6.15±0.26a | 30.83±1.62a    | 31.09±1.54a | 25.12±2.5a    | 24.97±2.47a | 23.48±0.58a    | 23.46±0.75a |
| TN4       | 6.05±1.37a     | 6.34±1.41a | 26.3±1.17a     | 26.56±1.09a | 24.05±3.5a    | 24.9±3.52a  | 22.13±1.29a    | 21.11±1.15a |
| TN5       | 6.01±1.94a     | 6.3±2.12a  | 26.6±2.64a     | 26.86±2.55a | 23.82±1.61a   | 23.68±1.65a | 22.35±3.19a    | 22.33±3.02a |

**Table S3.** The plant leaf area was affected by fertilizer type and fertilizer application rate in 2021 and 2022.

| Treatment | Seedling stage |               | Jointing stage    |                  | Filling stage   |                   | Maturing stage   |                  |
|-----------|----------------|---------------|-------------------|------------------|-----------------|-------------------|------------------|------------------|
|           | 2021           | 2022          | 2021              | 2022             | 2021            | 2022              | 2021             | 2022             |
| CK        | 74.79±3.5b     | 89.69±11.75a  | 4574.37±207.23d   | 4198.94±235c     | 3273.22±874.48b | 3273.22±874.48b   | 2304.99±81.83a   | 2356.45±79.11b   |
| N1        | 101.23±13.5ab  | 89.46±6.74a   | 6573.15±346.62ab  | 6533.37±179.78ab | 5831.55±236.45a | 4288.54±334.38ab  | 4308.13±246.58a  | 4288.54±334.38a  |
| N2        | 88.93±10.03ab  | 90.5±13.7a    | 6296.06±762.54b   | 6249.65±585.57ab | 7362.8±680.97a  | 4632.83±1147.39a  | 3940.14±1609.88a | 4249.49±644.78a  |
| N3        | 91.16±3.97ab   | 92.72±3.28a   | 6087.78±328.4bc   | 6084.1±788.94ab  | 7158.3±659.7a   | 4591.39±737.52a   | 4665.28±1129.84a | 4591.39±737.52a  |
| N4        | 98.15±20.13ab  | 99.71±15.58a  | 5544.52±767.19bcd | 5595.09±542bc    | 5770.41±547.6a  | 4062.47±808.21ab  | 4046.86±1586.26a | 4062.47±808.21ab |
| N5        | 129.88±37.71a  | 128.77±45.19a | 5794.66±350.14bcd | 5466.09±379.99bc | 5961.21±933.81a | 4300.57±717ab     | 4301.56±502.83a  | 4330.57±717a     |
| TN1       | 100.56±8.23ab  | 88.79±9.46a   | 7241.36±602.06a   | 7498.72±572.57a  | 6340.17±621.93a | 4282.8±475.86ab   | 4326.21±684.98a  | 4252.8±475.86a   |
| TN2       | 88.27±15.72ab  | 89.83±18.97a  | 4914.88±501.81cd  | 4922.86±863.37bc | 5976.82±629.62a | 3635.01±552.27ab  | 3980.11±855.75a  | 3968.34±990.58ab |
| TN3       | 90.49±2.44ab   | 92.55±5.12a   | 5650.05±299.09bcd | 5641.38±660.94bc | 6758.38±240.96a | 4532.02±1021.03ab | 4517.91±712.54a  | 4532.02±1021.03a |
| TN4       | 97.48±17.15ab  | 99.04±12.53a  | 5578±296.54bcd    | 5561.05±545.96bc | 6231.35±850.86a | 3891.83±639.35ab  | 4347.51±1169.48a | 3894.83±639.35ab |
| TN5       | 129.21±32.26a  | 124.11±39.4a  | 5535.61±506.34bcd | 5528.6±811.56bc  | 6288.27±489.26a | 4695.67±1068.74a  | 4278.94±1873.29a | 4129.01±159.23ab |

**Table S4.** The plant dry matter accumulation was affected by fertilizer type and fertilizer application rate in 2021 and 2022.

| Treatment | Seedling stage |            | Jointing stage |                | Filling stage  |                | Maturing stage  |                |
|-----------|----------------|------------|----------------|----------------|----------------|----------------|-----------------|----------------|
|           | 2021           | 2022       | 2021           | 2022           | 2021           | 2022           | 2021            | 2022           |
| CK        | 6.01±0.71a     | 6.3±0.84a  | 94.94±3.54b    | 86.36±6.96b    | 139.7±10.48b   | 138.77±3.66b   | 268.53±34.76b   | 216.96±12.85c  |
| N1        | 7.47±0.87a     | 7.76±0.76a | 113.93±17.86ab | 143.8±28.66ab  | 170.61±21.38ab | 169.68±10.88ab | 391.56±29.99ab  | 393.32±31.28a  |
| N2        | 6.29±0.71a     | 6.57±0.89a | 124.73±20.67ab | 150.54±29.24ab | 183.7±57.84ab  | 182.77±47.52ab | 352.03±62.94ab  | 353.8±52.92ab  |
| N3        | 7.08±0.72a     | 7.37±0.7a  | 147.14±50.2ab  | 120.48±1.4ab   | 213.34±7.99a   | 212.41±10.86a  | 422.33±25.29ab  | 424.09±28.29a  |
| N4        | 7.27±1.97a     | 7.56±1.98a | 135.64±19.03ab | 168.35±18.8a   | 185.95±4.32ab  | 185.02±11.7ab  | 414.28±50.2ab   | 413.05±38.84a  |
| N5        | 7.23±1.67a     | 7.52±1.86a | 128.03±15.96ab | 136.67±6.27ab  | 182.12±11.4ab  | 181.19±12.63ab | 410.92±51.64ab  | 402.69±60.01a  |
| TN1       | 5.92±0.48a     | 6.21±0.62a | 143.67±34.23ab | 118.4±16.41ab  | 173.08±16.91ab | 182.14±26.66ab | 358.11±113.28ab | 249.88±20.28bc |
| TN2       | 7.38±1.09a     | 7.66±0.98a | 150.41±23.49ab | 129.19±22.37ab | 190.37±0.72ab  | 189.43±10.55ab | 469.26±65.46ab  | 411.03±60.06a  |
| TN3       | 6.19±0.53a     | 6.48±0.72a | 126.34±4.39ab  | 141.6±51.85ab  | 188.76±13.28ab | 187.83±3.34ab  | 441.2±22.64a    | 442.97±16.35a  |
| TN4       | 6.99±0.91a     | 7.28±0.86a | 168.22±22.08a  | 150.1±17.26ab  | 182.61±23.59ab | 171.67±14.17ab | 347.7±26.83ab   | 339.47±39.85ab |
| TN5       | 7.18±2.12a     | 7.46±2.12a | 111.54±11.02ab | 132.49±15.44ab | 185.36±25.52ab | 187.43±27.51ab | 351.55±74.35ab  | 353.32±65.57ab |

**Table S5.** The average soil water content in different growth stage (n=3).

| Treatments |     | Jointing stage |          |          | Silking stage |          |          | Maturing stage |          |          |
|------------|-----|----------------|----------|----------|---------------|----------|----------|----------------|----------|----------|
|            |     | 0-20 cm        | 20-40 cm | 40-60 cm | 0-20 cm       | 20-40 cm | 40-60 cm | 0-20 cm        | 20-40 cm | 40-60 cm |
| 2021       | CK  | 17.70%         | 14.25%   | 7.55%    | 12.65%        | 16.16%   | 16.51%   | 12.97%         | 14.76%   | 15.58%   |
|            | N1  | 17.86%         | 13.90%   | 7.87%    | 12.02%        | 16.23%   | 16.87%   | 10.46%         | 14.29%   | 16.00%   |
|            | N2  | 18.40%         | 12.20%   | 11.42%   | 12.55%        | 16.82%   | 19.61%   | 11.86%         | 14.14%   | 14.59%   |
|            | N3  | 18.23%         | 13.33%   | 7.59%    | 13.61%        | 17.47%   | 18.21%   | 11.41%         | 14.20%   | 15.08%   |
|            | N4  | 17.32%         | 14.12%   | 7.91%    | 11.84%        | 16.11%   | 17.32%   | 13.00%         | 14.55%   | 14.22%   |
|            | N5  | 17.75%         | 13.17%   | 9.02%    | 11.92%        | 15.46%   | 17.77%   | 11.96%         | 14.02%   | 14.58%   |
|            | TN1 | 13.16%         | 8.32%    | 10.26%   | 13.81%        | 16.05%   | 17.17%   | 11.01%         | 14.08%   | 15.23%   |
|            | TN2 | 16.21%         | 8.89%    | 8.41%    | 15.69%        | 17.08%   | 19.86%   | 11.98%         | 15.23%   | 17.39%   |
|            | TN3 | 17.44%         | 12.22%   | 7.55%    | 13.98%        | 16.99%   | 17.57%   | 10.63%         | 14.00%   | 14.05%   |
|            | TN4 | 15.78%         | 9.70%    | 9.57%    | 15.70%        | 17.44%   | 19.60%   | 11.09%         | 15.02%   | 14.41%   |
|            | TN5 | 17.85%         | 11.91%   | 8.38%    | 14.38%        | 17.02%   | 17.80%   | 11.92%         | 14.13%   | 15.64%   |
| 2022       | CK  | 18.37%         | 8.80%    | 8.24%    | 14.91%        | 16.32%   | 16.32%   | 14.30%         | 15.05%   | 15.95%   |
|            | N1  | 17.86%         | 9.51%    | 7.96%    | 14.36%        | 16.91%   | 16.92%   | 13.35%         | 14.62%   | 15.40%   |
|            | N2  | 16.62%         | 8.21%    | 8.76%    | 14.04%        | 17.79%   | 19.31%   | 13.85%         | 14.70%   | 14.59%   |
|            | N3  | 17.94%         | 9.59%    | 8.12%    | 15.49%        | 17.08%   | 17.88%   | 14.05%         | 15.14%   | 14.38%   |
|            | N4  | 16.37%         | 8.08%    | 8.90%    | 13.89%        | 18.11%   | 17.09%   | 14.76%         | 15.42%   | 15.02%   |
|            | N5  | 17.70%         | 7.41%    | 8.17%    | 12.16%        | 17.07%   | 17.48%   | 13.63%         | 14.84%   | 14.82%   |
|            | TN1 | 12.50%         | 8.12%    | 10.26%   | 15.31%        | 16.57%   | 17.49%   | 13.21%         | 15.00%   | 15.47%   |
|            | TN2 | 11.85%         | 8.16%    | 10.52%   | 16.11%        | 18.02%   | 20.24%   | 14.94%         | 17.63%   | 17.44%   |
|            | TN3 | 14.16%         | 8.85%    | 9.23%    | 16.07%        | 17.49%   | 16.74%   | 13.10%         | 13.82%   | 13.97%   |
|            | TN4 | 13.89%         | 8.80%    | 10.70%   | 16.92%        | 18.36%   | 20.00%   | 13.65%         | 15.19%   | 15.47%   |
|            | TN5 | 16.96%         | 8.76%    | 8.35%    | 16.14%        | 17.69%   | 17.31%   | 13.03%         | 15.45%   | 15.07%   |

**Table S6.** The average soil pH in different growth stage (n=3).

| Treatments |     | Jointing stage |           |           | Silking stage |           |           | Maturing stage |           |           |
|------------|-----|----------------|-----------|-----------|---------------|-----------|-----------|----------------|-----------|-----------|
|            |     | 0-20 cm        | 20-40 cm  | 40-60 cm  | 0-20 cm       | 20-40 cm  | 40-60 cm  | 0-20 cm        | 20-40 cm  | 40-60 cm  |
| 2021       | CK  | 8.59±0.03      | 8.65±0.05 | 8.76±0.03 | 8.46+0.05     | 8.5+0.04  | 8.43+0.04 | 8.51+0.04      | 8.56+0.01 | 8.59+0.08 |
|            | N1  | 8.42+0.04      | 8.55+0.09 | 8.71+0.05 | 8.54+0.01     | 8.5+0.01  | 8.44+0.05 | 8.24+0.07      | 8.21+0.05 | 8.17+0.05 |
|            | N2  | 8.34+0.11      | 8.53+0.08 | 8.62+0.01 | 8.47+0.06     | 8.54+0.03 | 8.43+0.06 | 8.56+0.1       | 8.53+0.05 | 8.51+0.1  |
|            | N3  | 8.49+0.07      | 8.48+0.05 | 8.69+0.02 | 8.54+0.02     | 8.41+0.08 | 8.57+0.02 | 8.35+0.01      | 8.33+0.02 | 8.43+0.02 |
|            | N4  | 8.31+0.05      | 8.59+0.01 | 8.61+0.03 | 8.47+0.03     | 8.63+0.04 | 8.4+0.04  | 8.45+0.03      | 8.49+0.03 | 8.47+0.16 |
|            | N5  | 8.33+0.2       | 8.53+0.16 | 8.61+0.09 | 8.41+0.02     | 8.62+0.02 | 8.57+0.12 | 8.28+0.01      | 8.38+0.02 | 8.39+0.01 |
|            | TN1 | 8.57+0.02      | 8.62+0.04 | 8.62+0.02 | 8.28+0.05     | 8.32+0.02 | 8.39+0.04 | 8.36+0.04      | 8.49+0.02 | 8.52+0.06 |
|            | TN2 | 8.4+0.07       | 8.6+0.02  | 8.58+0.08 | 8.17+0.02     | 8.49+0.04 | 8.38+0.06 | 8.34+0.04      | 8.46+0.04 | 8.55+0.05 |
|            | TN3 | 8.54+0.18      | 8.68+0.01 | 8.66+0.03 | 8.56+0.03     | 8.43+0.03 | 8.51+0.03 | 8.59+0.02      | 8.52+0.05 | 8.51+0.06 |
|            | TN4 | 8.49+0.03      | 8.63+0.06 | 8.54+0.02 | 8.35+0.04     | 8.45+0.07 | 8.54+0.02 | 8.43+0.04      | 8.5+0.02  | 8.43+0.08 |
|            | TN5 | 8.45+0.15      | 8.6+0.05  | 8.63+0.05 | 8.63+0.01     | 8.5+0.01  | 8.4+0.06  | 8.52+0.06      | 8.45+0.08 | 8.49+0.01 |
| 2022       | CK  | 8.68+0.04      | 8.63+0.05 | 8.58+0.01 | 8.63+0.03     | 8.49+0.03 | 8.4+0.09  | 8.51+0.03      | 8.56+0.07 | 8.51+0.05 |
|            | N1  | 8.51+0.06      | 8.73+0.02 | 8.62+0.04 | 8.41+0.01     | 8.36+0.08 | 8.55+0.02 | 8.26+0.02      | 8.14+0.07 | 8.16+0.08 |
|            | N2  | 8.25+0.06      | 8.6+0.08  | 8.54+0.02 | 8.44+0.11     | 8.49+0.02 | 8.51+0.11 | 8.69+0.07      | 8.5+0.09  | 8.45+0.08 |
|            | N3  | 8.35+0.14      | 8.66+0.05 | 8.6+0.03  | 8.45+0.08     | 8.65+0.03 | 8.6+0.06  | 8.3+0.02       | 8.42+0.02 | 8.37+0.01 |
|            | N4  | 8.41+0.05      | 8.65+0.02 | 8.59+0.05 | 8.52+0.05     | 8.53+0.03 | 8.54+0.03 | 8.55+0.06      | 8.55+0.02 | 8.51+0.06 |
|            | N5  | 8.29+0.05      | 8.65+0.02 | 8.62+0.05 | 8.5+0.02      | 8.59+0.04 | 8.62+0.01 | 8.24+0.02      | 8.38+0.06 | 8.3+0.03  |
|            | TN1 | 8.6+0.04       | 8.63+0.03 | 8.54+0.03 | 8.29+0.02     | 8.37+0.02 | 8.41+0.02 | 8.45+0.04      | 8.49+0.04 | 8.56+0.04 |
|            | TN2 | 8.46+0.02      | 8.58+0.05 | 8.5+0.02  | 8.23+0.1      | 8.44+0.02 | 8.37+0.07 | 8.4+0.05       | 8.42+0.03 | 8.43+0.02 |
|            | TN3 | 8.48+0.02      | 8.65+0.04 | 8.61+0.05 | 8.59+0.06     | 8.66+0.05 | 8.61+0.08 | 8.45+0.04      | 8.51+0.06 | 8.43+0.07 |
|            | TN4 | 8.56+0.04      | 8.56+0.02 | 8.55+0.01 | 8.41+0.06     | 8.48+0.04 | 8.52+0.01 | 8.46+0.05      | 8.45+0.06 | 8.53+0.04 |
|            | TN5 | 8.52+0.1       | 8.64+0.04 | 8.54+0.04 | 8.53+0.07     | 8.45+0.03 | 8.54+0.04 | 8.5+0.02       | 8.52+0.01 | 8.47+0.04 |

**Table S7.** The average soil salt content in different growth stage (n=3).

| Treatments |     | Jointing stage |           |           | Silking stage |           |           | Maturing stage |           |           |
|------------|-----|----------------|-----------|-----------|---------------|-----------|-----------|----------------|-----------|-----------|
|            |     | 0-20 cm        | 20-40 cm  | 40-60 cm  | 0-20 cm       | 20-40 cm  | 40-60 cm  | 0-20 cm        | 20-40 cm  | 40-60 cm  |
| 2021       | CK  | 1.05+0.11      | 0.38+0.07 | 0.25±0.02 | 0.31±0.02     | 0.28±0    | 0.27±0.01 | 0.27±0.01      | 0.27±0.01 | 0.27±0.01 |
|            | N1  | 0.44+0.03      | 0.43+0.03 | 0.26±0    | 0.28±0.01     | 0.27±0    | 0.29±0.01 | 0.29±0.03      | 0.29±0.03 | 0.29±0.03 |
|            | N2  | 0.43+0.06      | 0.29+0.02 | 0.24±0.02 | 0.34±0.02     | 0.27±0.01 | 0.28±0.01 | 0.28±0.02      | 0.28±0.02 | 0.28±0.02 |
|            | N3  | 0.33+0.02      | 0.31+0.01 | 0.31±0.01 | 0.31±0.01     | 0.32±0.01 | 0.32±0.01 | 0.28±0.01      | 0.28±0.01 | 0.28±0.01 |
|            | N4  | 0.37+0.01      | 0.3+0.01  | 0.29±0.01 | 0.31±0.03     | 0.33±0.01 | 0.33±0.01 | 0.27±0.01      | 0.27±0.01 | 0.27±0.01 |
|            | N5  | 0.43+0.06      | 0.29+0.01 | 0.24±0.01 | 0.34±0.02     | 0.28±0.01 | 0.27±0.01 | 0.25±0         | 0.25±0    | 0.25±0    |
|            | TN1 | 0.35+0.03      | 0.29+0.01 | 0.29±0    | 0.29±0.01     | 0.3±0.02  | 0.29±0.03 | 0.24±0.01      | 0.24±0.01 | 0.24±0.01 |
|            | TN2 | 0.37+0.02      | 0.26+0.01 | 0.28±0.02 | 0.3±0.01      | 0.31±0.01 | 0.27±0.01 | 0.27±0.01      | 0.27±0.01 | 0.27±0.01 |
|            | TN3 | 0.48+0.07      | 0.28+0.01 | 0.25±0    | 0.3±0         | 0.3±0     | 0.28±0.01 | 0.28±0.01      | 0.28±0.01 | 0.28±0.01 |
|            | TN4 | 0.48+0.06      | 0.32+0.02 | 0.24±0.01 | 0.33±0.02     | 0.29±0.01 | 0.3±0.02  | 0.32±0.06      | 0.32±0.06 | 0.32±0.06 |
|            | TN5 | 0.41+0.03      | 0.32+0.01 | 0.32±0.02 | 0.33±0        | 0.3±0.02  | 0.35±0.02 | 0.27±0.01      | 0.27±0.01 | 0.27±0.01 |
| 2022       | CK  | 0.71+0.15      | 0.26+0.01 | 0.27+0.01 | 0.27±0        | 8.56+0.01 | 8.56+0.01 | 0.27±0.02      | 0.27±0.01 | 0.27±0.01 |
|            | N1  | 0.47+0.12      | 0.26+0.01 | 0.3+0.01  | 0.29±0.02     | 8.21+0.05 | 8.21+0.05 | 0.27±0.02      | 0.29±0.03 | 0.29±0.03 |
|            | N2  | 0.35+0.02      | 0.24+0.01 | 0.29+0.01 | 0.32±0        | 8.53+0.05 | 8.53+0.05 | 0.27±0.04      | 0.28±0.02 | 0.28±0.02 |
|            | N3  | 0.31+0.01      | 0.31+0.01 | 0.31+0.01 | 0.32±0.01     | 8.33+0.02 | 8.33+0.02 | 0.3±0.03       | 0.28±0.01 | 0.28±0.01 |
|            | N4  | 0.33+0.03      | 0.29+0.01 | 0.32+0.01 | 0.32±0.01     | 8.49+0.03 | 8.49+0.03 | 0.25±0         | 0.27±0.01 | 0.27±0.01 |
|            | N5  | 0.34+0.03      | 0.24+0    | 0.3+0.01  | 0.31±0        | 8.38+0.02 | 8.38+0.02 | 0.27±0.01      | 0.25±0    | 0.25±0    |
|            | TN1 | 0.31+0.03      | 0.26+0.01 | 0.33+0.01 | 0.31±0.01     | 8.49+0.02 | 8.49+0.02 | 0.27±0.01      | 0.24±0.01 | 0.24±0.01 |
|            | TN2 | 0.29+0.01      | 0.26+0.02 | 0.33+0.04 | 0.27±0.02     | 8.46+0.04 | 8.46+0.04 | 0.26±0.01      | 0.27±0.01 | 0.27±0.01 |
|            | TN3 | 0.37+0.03      | 0.27+0.01 | 0.29+0.01 | 0.29±0.01     | 8.52+0.05 | 8.52+0.05 | 0.27±0.01      | 0.28±0.01 | 0.28±0.01 |
|            | TN4 | 0.56+0.04      | 0.24+0.01 | 0.34+0.02 | 0.31±0.02     | 8.5+0.02  | 8.5+0.02  | 0.28±0.02      | 0.32±0.06 | 0.32±0.06 |
|            | TN5 | 0.38+0.05      | 0.3+0     | 0.36+0.01 | 0.27+0.01     | 8.45+0.08 | 8.45+0.08 | 0.27±0.01      | 0.27±0.01 | 0.27±0.01 |

**Table S8.** The average soil alkali-hydrolyzale nitrogen content in different growth stage (n=3).

| Treatments |     | Jointing stage |            |            | Silking stage |            |            | Maturing stage |            |            |
|------------|-----|----------------|------------|------------|---------------|------------|------------|----------------|------------|------------|
|            |     | 0-20 cm        | 20-40 cm   | 40-60 cm   | 0-20 cm       | 20-40 cm   | 40-60 cm   | 0-20 cm        | 20-40 cm   | 40-60 cm   |
| 2021       | CK  | 40.83±3.95     | 29.75±1.75 | 23.04±2.53 | 36.46±1.82    | 20.71±1.34 | 20.71±1.34 | 27.42±2.2      | 23.33±0.51 | 18.38±1.52 |
|            | N1  | 45.21±1.34     | 30.63±0.88 | 19.25±0.88 | 36.17±2.67    | 28±2.63    | 22.17±2.81 | 35.29±2.67     | 25.96±4.49 | 23.63±6.13 |
|            | N2  | 49.29±2.02     | 30.63±4.01 | 21±0.88    | 37.33±4.82    | 24.5±4.01  | 21.88±0.88 | 28.58±1.82     | 24.21±4.14 | 22.46±1.34 |
|            | N3  | 47.54±2.2      | 32.38±2.63 | 21.88±0.88 | 39.08±2.81    | 28.58±0.51 | 22.17±0.51 | 34.71±4.32     | 21.29±1.34 | 16.92±0.51 |
|            | N4  | 47.54±3.64     | 35±4.01    | 23.33±2.67 | 48.42±1.34    | 24.33±1.15 | 23.45±2.64 | 37.04±2.81     | 24.5±6.06  | 21.88±1.75 |
|            | N5  | 47.54±2.2      | 33.54±1.01 | 24.5±0.88  | 42±1.52       | 32.67±5.35 | 21.58±4.14 | 40.25±2.32     | 29.46±3.95 | 30.92±1.34 |
|            | TN1 | 40.25±1.75     | 27.71±0.51 | 25.08±5.35 | 48.71±3.95    | 29.75±3.03 | 19.83±4.4  | 36.46±3.31     | 26.25±0.88 | 19.54±1.34 |
|            | TN2 | 41.08±1.28     | 30.92±0.51 | 27.71±0.51 | 42.29±0.51    | 27.42±4.82 | 28±1.52    | 35.29±1.34     | 21.29±2.2  | 26.25±0.88 |
|            | TN3 | 45.21±2.67     | 32.08±3.54 | 22.17±2.53 | 42.88±0.88    | 29.17±3.31 | 21.58±2.2  | 33.54±2.67     | 28.29±1.82 | 22.17±4.82 |
|            | TN4 | 40.92±3.26     | 30.92±1.82 | 28.88±2.32 | 42.58±2.81    | 33.54±1.34 | 21.88±2.32 | 42±2.32        | 29.17±1.34 | 23.92±3.54 |
|            | TN5 | 48.71±4.82     | 34.71±5.27 | 28.58±0.51 | 48.71±1.34    | 37.92±2.2  | 21.29±2.2  | 47.54±3.54     | 30.92±1.34 | 26.25±1.52 |
| 2022       | CK  | 35.58±2.2      | 28±1.52    | 16.63±0.88 | 32.08±2.2     | 19.83±1.34 | 22.17±0.51 | 25.67±1.34     | 19.25±4.01 | 15.75±6.83 |
|            | N1  | 37.33±2.02     | 28±3.03    | 18.96±3.31 | 35.58±1.34    | 22.75±0.88 | 22.75±0.88 | 29.17±2.53     | 18.67±3.95 | 22.75±2.63 |
|            | N2  | 42.88±0.88     | 23.33±1.01 | 15.17±2.53 | 28.58±3.31    | 25.08±3.07 | 21±2.32    | 24.79±1.82     | 20.71±1.01 | 19.83±3.07 |
|            | N3  | 41.71±2.53     | 24.5±2.32  | 20.42±2.67 | 34.71±1.34    | 22.75±3.03 | 22.17±3.54 | 28±1.75        | 16.92±3.31 | 22.46±3.54 |
|            | N4  | 42.88±2.63     | 25.38±1.52 | 21.88±0.88 | 38.73±2.83    | 22.46±2.67 | 14.41±1.97 | 27.42±2.2      | 20.13±1.75 | 21.58±0.51 |
|            | N5  | 37.92±2.67     | 28.29±1.34 | 26.54±0.51 | 39.96±3.31    | 22.75±1.75 | 19.83±4.04 | 34.71±1.34     | 27.71±1.34 | 28.29±1.34 |
|            | TN1 | 36.17±1.01     | 28.29±1.82 | 19.25±1.75 | 36.75±2.63    | 23.04±3.64 | 14.29±1.01 | 28.29±2.02     | 23.92±3.64 | 19.54±2.81 |
|            | TN2 | 33.83±1.82     | 30.04±1.34 | 21.88±2.63 | 34.42±1.82    | 24.21±3.07 | 25.96±0.51 | 30.04±1.34     | 22.17±2.02 | 27.13±2.32 |
|            | TN3 | 36.75±3.15     | 25.96±2.81 | 20.71±1.34 | 35.88±2.32    | 20.42±0.51 | 15.75±0.88 | 28.88±0.88     | 22.75±2.63 | 20.42±1.82 |
|            | TN4 | 47.83±5.05     | 30.92±1.34 | 29.17±5.83 | 33.54±0.51    | 33.83±4.32 | 21.58±0.51 | 35.29±3.07     | 23.33±1.82 | 25.96±4.4  |
|            | TN5 | 44.04±2.67     | 31.79±3.07 | 28±0.88    | 40.25±2.32    | 27.42±1.34 | 23.92±1.82 | 33.25±3.15     | 31.21±3.07 | 29.17±0.51 |

**Table S9.** The average soil nitrate nitrogen content in different growth stage (n=3).

| Treatments |     | Jointing stage |               |                | Silking stage |              |               | Maturing stage |              |             |
|------------|-----|----------------|---------------|----------------|---------------|--------------|---------------|----------------|--------------|-------------|
|            |     | 0-20 cm        | 20-40 cm      | 40-60 cm       | 0-20 cm       | 20-40 cm     | 40-60 cm      | 0-20 cm        | 20-40 cm     | 40-60 cm    |
| 2021       | CK  | 24.95±6.71b    | 10.98±1.99bc  | 7.35±0.33e     | 9.53±1.86b    | 6.5±1.01bc   | 4.34±0.78e    | 5.23±0.68bc    | 4.34±0.75c   | 2.83±0.21b  |
|            | N1  | 23.06±0.9b     | 12.01±3.01abc | 11.93±1.6de    | 9.91±0.43b    | 6.99±0.65abc | 4.82±1.33de   | 4.31±0.85c     | 4.93±0.77bc  | 3.72±1.51b  |
|            | N2  | 31.51±5.21ab   | 16.31±1.37c   | 6.82±1.51bcd   | 11.21±0.42ab  | 5.67±1.38c   | 6.52±0.61bcd  | 5.81±0.99bc    | 4.48±0.2c    | 5.39±0.87ab |
|            | N3  | 68.75±14.04ab  | 17.62±3.39abc | 10.08±0.8bcde  | 10.46±1.91ab  | 8.76±2.42abc | 5.61±0.37bcde | 5.91±0.76bc    | 4.6±0.56c    | 4.93±0.8ab  |
|            | N4  | 94.86±3.01a    | 23.94±2.47c   | 8.43±0.41abc   | 13.74±1.4a    | 5.66±1.27c   | 7.08±0.6abc   | 8.47±0.35b     | 6.66±0.99ab  | 3.83±0.35b  |
|            | N5  | 88.53±7.45ab   | 25.09±2.44a   | 10.93±1.77abcd | 11.09±0.63ab  | 10.08±0.78a  | 6.94±1.06abcd | 7.45±1.96bc    | 3.43±0.26c   | 2.9±1.31b   |
|            | TN1 | 22.36±0.52b    | 13.82±1.89abc | 8.29±2de       | 9.42±0.62b    | 7.01±0.62abc | 4.84±0.29de   | 4.98±0.14bc    | 4.6±0.69c    | 5±0.7ab     |
|            | TN2 | 29.94±1.8b     | 12.58±1.75abc | 9.19±0.74bcde  | 9.19±0.64b    | 7.65±1.04abc | 6.27±0.69bcde | 6.02±0.8bc     | 4.23±0.26c   | 4.15±0.8b   |
|            | TN3 | 42.91±4.5ab    | 14.93±2.12abc | 10.05±0.85cde  | 11.64±0.68ab  | 7.4±0.68abc  | 5.23±0.17cde  | 7.4±1.52bc     | 5.36±0.12bc  | 3.71±0.41b  |
|            | TN4 | 54.3±3.92ab    | 34.8±2.57ab   | 16.09±6.96a    | 12.17±1.12ab  | 9.14±0.61ab  | 8.56±1.03a    | 5.48±0.85bc    | 5.12±0.19bc  | 4.92±1.01ab |
|            | TN5 | 74.59±5.04ab   | 39.12±3.51ab  | 12.06±3.35ab   | 12.48±1.97ab  | 9.58±0.3ab   | 7.37±0.64ab   | 13.83±2.75a    | 7.66±1.43a   | 7.3±2.33a   |
| 2022       | CK  | 32.09±0.41c    | 10.21±0.89d   | 7.3±0.41cde    | 8.23±0.75c    | 5.09±0.53d   | 3.6±0.36cde   | 5.61±0.71a     | 2.44±0.03e   | 3.72±0.83ab |
|            | N1  | 29.06±1.89c    | 12.37±1.35d   | 10.55±1.97cde  | 9.58±1.26c    | 5.62±0.5d    | 4.13±1.18cde  | 5.34±0.11a     | 3.25±0.49de  | 2.97±0.64b  |
|            | N2  | 49.48±4.29bc   | 15.41±1.48d   | 8.72±2.25e     | 10.73±0.75bc  | 5.84±1.48d   | 2.72±1e       | 5.61±1.45a     | 4.18±0.47bcd | 3.11±1.26b  |
|            | N3  | 75.64±7.73c    | 17.19±0.65d   | 8.47±0.63cde   | 8.69±2.11c    | 6.25±0.49d   | 3.61±0.5cde   | 5.81±0.63a     | 4.45±0.91bcd | 4.65±1.04ab |
|            | N4  | 92.67±5.55ab   | 19.88±1.75d   | 10.47±1.59bc   | 13.19±0.57ab  | 4.95±0.45d   | 6.64±2.13bc   | 8.1±1.21a      | 5.59±0.64b   | 2.69±0.29b  |
|            | N5  | 94.66±3.42c    | 24.46±1.38bc  | 11.7±0.86bcd   | 9.91±0.9c     | 8.18±0.2bc   | 5.84±0.45bcd  | 6.42±1.52a     | 5.07±0.24bc  | 2.96±0.17b  |
|            | TN1 | 16.05±4.08c    | 11.79±1.61d   | 6.86±0.35de    | 8.45±0.31c    | 5.72±0.48d   | 3.44±0.39de   | 5.56±1.05a     | 3.82±0.46cde | 3.99±0.23ab |
|            | TN2 | 24.76±0.87c    | 12.59±1.29cd  | 8.23±1.43bcd   | 8.81±0.37c    | 6.49±0.86cd  | 5.95±0.75bcd  | 5.58±0.75a     | 4.27±0.59bcd | 3.77±1.36ab |
|            | TN3 | 28.13±3.62c    | 14.26±3.64d   | 8.79±0.81cde   | 9.38±0.73c    | 6.16±0.9d    | 5±0.78cde     | 5.95±0.69a     | 3.46±0.64cde | 4.49±0.32ab |
|            | TN4 | 56.42±6.22bc   | 28.34±3.93ab  | 12.94±0.59a    | 10.65±0.7bc   | 9.45±0.45ab  | 10.8±1.79a    | 6.27±0.4a      | 4.42±1.01bcd | 4.27±1.39ab |
|            | TN5 | 68.69±5.37a    | 23.46±4.37a   | 16.86±5.49b    | 13.85±2.47a   | 10.46±1.06a  | 8.05±1.12b    | 7.76±1.64a     | 7.6±0.82a    | 5.97±0.63a  |



**Table S10.** The average soil ammonium nitrogen content in different growth stage (n=3).

| Treatments |     | Jointing stage |           |           | Silking stage |           |           | Maturing stage |           |           |
|------------|-----|----------------|-----------|-----------|---------------|-----------|-----------|----------------|-----------|-----------|
|            |     | 0-20 cm        | 20-40 cm  | 40-60 cm  | 0-20 cm       | 20-40 cm  | 40-60 cm  | 0-20 cm        | 20-40 cm  | 40-60 cm  |
| 2021       | CK  | 2.33±0.22      | 1.73±0.21 | 1.48±0.32 | 1.71±0.07     | 1.46±0.16 | 1.39±0.19 | 1.16±0.14      | 0.93±0.11 | 0.73±0.06 |
|            | N1  | 2.09±0.11      | 1.9±0.04  | 1.97±0.07 | 1.95±0.06     | 1.56±0.05 | 1.38±0.02 | 1.18±0.16      | 0.68±0.13 | 0.77±0.09 |
|            | N2  | 2.85±0.24      | 1.95±0.22 | 1.85±0.07 | 2.35±0.28     | 1.72±0.1  | 1.82±0.09 | 1.34±0.32      | 0.72±0.05 | 0.88±0.02 |
|            | N3  | 2.55±0.03      | 2.05±0.09 | 1.96±0.17 | 2.75±0.59     | 1.84±0.2  | 2.03±0.11 | 1.42±0.08      | 0.74±0.01 | 0.92±0.06 |
|            | N4  | 2.88±0.27      | 2.32±0.02 | 1.35±0.08 | 4.45±0.23     | 2.25±0.33 | 1.59±0.15 | 1.48±0.31      | 0.92±0.17 | 0.71±0.08 |
|            | N5  | 3.65±0.42      | 2.43±0.21 | 2.04±0.08 | 4.17±0.53     | 1.79±0.08 | 1.7±0.15  | 1.35±0.05      | 0.99±0.01 | 0.74±0.01 |
|            | TN1 | 2.09±0.05      | 1.53±0.03 | 1.79±0.2  | 2.14±0.44     | 1.72±0.06 | 1.67±0.26 | 1.87±0.01      | 1.27±0.13 | 1.37±0.18 |
|            | TN2 | 1.65±0.15      | 1.78±0.17 | 1.5±0.12  | 2.24±0.12     | 2.07±0.21 | 1.57±0.04 | 2.04±0.09      | 1.39±0.09 | 1.54±0.09 |
|            | TN3 | 1.98±0.18      | 1.84±0.28 | 1.88±0.08 | 2.59±0.14     | 2.08±0.17 | 1.89±0.12 | 1.89±0.07      | 1.23±0.02 | 1.45±0.04 |
|            | TN4 | 2.52±0.45      | 1.64±0.1  | 1.41±0.22 | 2.59±0.1      | 2.17±0.09 | 1.98±0.27 | 2.07±0.03      | 1.69±0.09 | 1.48±0.14 |
|            | TN5 | 2.18±0.11      | 1.96±0.11 | 1.27±0.05 | 3.04±0.19     | 1.76±0.13 | 2.33±0.09 | 2.34±0.19      | 1.51±0.12 | 1.64±0.01 |
| 2022       | CK  | 1.64±0.2       | 1.39±0.12 | 1.7±0.24  | 1.73±0.09     | 1.26±0.15 | 1.48±0.16 | 0.79±0.1       | 0.89±0.12 | 0.75±0.04 |
|            | N1  | 2.03±0.13      | 2.37±0.22 | 1.74±0.28 | 1.61±0.39     | 1.58±0.25 | 1.38±0.12 | 0.97±0.2       | 0.68±0.02 | 0.88±0.07 |
|            | N2  | 2.14±0.09      | 1.91±0.01 | 1.72±0.16 | 2.24±0.38     | 1.74±0.2  | 1.36±0.11 | 1.03±0.06      | 0.79±0.02 | 0.92±0.08 |
|            | N3  | 2.19±0.1       | 2.02±0.08 | 1.82±0.41 | 2.2±0.07      | 1.86±0.05 | 1.92±0.16 | 0.91±0.08      | 0.68±0.07 | 0.85±0.09 |
|            | N4  | 2.28±0.16      | 1.6±0.12  | 1.34±0.22 | 2.06±0.07     | 1.68±0.09 | 1.86±0.18 | 0.99±0.12      | 0.74±0.09 | 0.71±0.04 |
|            | N5  | 3.3±0.11       | 2.17±0.05 | 1.79±0.2  | 2.69±0.3      | 1.74±0.18 | 2.02±0.21 | 1.32±0.07      | 0.83±0.02 | 0.87±0.1  |
|            | TN1 | 1.93±0.12      | 1.85±0.03 | 1.44±0.2  | 2.1±0.16      | 1.72±0.16 | 1.84±0.35 | 1.55±0.06      | 1.24±0.05 | 1.34±0.11 |
|            | TN2 | 1.95±0.21      | 1.88±0.05 | 1.59±0.15 | 2.1±0.05      | 1.86±0.27 | 1.95±0.09 | 1.6±0.07       | 1.48±0.22 | 1.65±0.06 |
|            | TN3 | 1.77±0.09      | 1.57±0.13 | 1.74±0.15 | 2.14±0.22     | 2.01±0.32 | 1.76±0.13 | 1.66±0.12      | 1.37±0.12 | 1.53±0.02 |
|            | TN4 | 1.94±0.13      | 1.73±0.09 | 1.88±0.04 | 2.2±0.13      | 1.88±0.07 | 2.14±0.09 | 1.7±0.04       | 1.47±0.12 | 1.63±0.1  |
|            | TN5 | 2.01±0.18      | 1.79±0.08 | 1.91±0.37 | 3.34±0.12     | 1.74±0.14 | 2.17±0.17 | 2.03±0.03      | 1.78±0.14 | 1.58±0.07 |

**Table S11.** The average soil available potassium content in different growth stage (n=3).

| Treatments |     | Jointing stage |            |            | Silking stage |            |            | Maturing stage |             |            |
|------------|-----|----------------|------------|------------|---------------|------------|------------|----------------|-------------|------------|
|            |     | 0-20 cm        | 20-40 cm   | 40-60 cm   | 0-20 cm       | 20-40 cm   | 40-60 cm   | 0-20 cm        | 20-40 cm    | 40-60 cm   |
| 2021       | CK  | 97±7.21        | 61.33±3.06 | 57.33±3.79 | 79.67±5.86    | 76.67±2.08 | 72±1       | 81.33±14.01    | 49.67±1.15  | 54.33±0.58 |
|            | N1  | 109.33±10.41   | 54.67±1.15 | 61±2.65    | 92±7.94       | 65.67±2.08 | 72.33±2.08 | 92.67±8.39     | 69±1.73     | 78.67±5.69 |
|            | N2  | 93.67±3.06     | 59.67±3.51 | 51.67±3.21 | 88.67±5.13    | 67±1       | 67.67±7.02 | 90±4.58        | 69.33±1.53  | 67.33±3.21 |
|            | N3  | 86±7           | 89.67±2.08 | 87±1.73    | 83.67±6.81    | 83±1       | 89±4.36    | 85.33±5.77     | 62.33±1.53  | 63.67±4.62 |
|            | N4  | 77.33±6.66     | 46±2.65    | 45±1       | 82.67±4.51    | 91.33±6.81 | 84.33±3.21 | 89.67±2.52     | 68.33±2.52  | 80.33±5.51 |
|            | N5  | 84±2           | 51.67±1.15 | 51.33±1.53 | 98±10         | 74±2.65    | 76.33±1.53 | 88.67±6.11     | 62.33±1.53  | 63±2.65    |
|            | TN1 | 87±4.58        | 93.33±4.51 | 89±0       | 94.33±5.03    | 83.67±3.79 | 74.33±2.08 | 88±6.56        | 63.33±6.81  | 62.67±6.03 |
|            | TN2 | 77.33±14.64    | 87.33±3.51 | 88±3.61    | 90.33±6.51    | 81.33±2.08 | 80.67±1.15 | 91±5.2         | 69.67±20.23 | 66±1       |
|            | TN3 | 76±7           | 85.67±0.58 | 78±7.81    | 95±6.56       | 75.67±2.31 | 80.67±4.93 | 91±3           | 71±3        | 76.67±2.08 |
|            | TN4 | 82±4.58        | 93±2.65    | 89±7       | 96.33±4.73    | 93±5       | 94.33±4.16 | 94.67±5.51     | 78.33±5.77  | 80±6.93    |
|            | TN5 | 88.33±4.51     | 75±4.58    | 70.67±2.08 | 98±3.61       | 89±2.65    | 96±2.65    | 89.67±7.02     | 91.67±8.62  | 94.33±6.81 |
| 2022       | CK  | 91.33±6.66     | 55±1       | 63±2       | 78±7.21       | 70.33±4.73 | 68.67±2.52 | 60.33±2.52     | 52.33±2.52  | 52±1       |
|            | N1  | 92±1           | 59.33±2.08 | 58±4.36    | 75.67±1.15    | 64±2.65    | 77±2       | 77.33±4.16     | 73.33±5.03  | 77.33±3.21 |
|            | N2  | 98±1           | 53.67±3.21 | 53.67±3.06 | 84.67±5.51    | 68.33±0.58 | 70±1       | 66.67±6.03     | 70.33±4.93  | 65.67±3.21 |
|            | N3  | 85.33±4.04     | 81±4.36    | 98.33±1.15 | 90.67±5.13    | 91.33±4.62 | 85±2.65    | 65±5.2         | 58.67±6.66  | 75.67±1.15 |
|            | N4  | 94±1           | 43.33±3.21 | 42.33±2.08 | 86.33±10.41   | 94.33±4.04 | 88.33±2.31 | 76.33±6.11     | 79.67±2.89  | 95.67±2.08 |
|            | N5  | 96±2           | 53.67±0.58 | 52±1.73    | 97.67±9.24    | 71±3.61    | 82.67±4.93 | 89.33±4.04     | 65±3.46     | 63.33±2.31 |
|            | TN1 | 84±4.36        | 95.33±2.31 | 93.33±2.31 | 89±0          | 77.33±2.89 | 72.67±2.31 | 65.67±6.51     | 60±2.65     | 58.33±2.52 |
|            | TN2 | 64.67±7.09     | 93.33±3.79 | 84.67±6.66 | 91.33±6.35    | 83±1       | 79.67±1.15 | 69.33±1.53     | 78±21.93    | 66±4.36    |
|            | TN3 | 75.33±4.04     | 83±8.54    | 77.67±4.16 | 95.67±5.03    | 75±3.61    | 77.33±4.73 | 84±16.37       | 73.33±5.13  | 66.67±5.03 |
|            | TN4 | 79±4.36        | 91.67±0.58 | 84.67±2.31 | 98±7          | 94.67±2.89 | 94±5.2     | 81.67±5.03     | 79.67±2.08  | 76.67±9.45 |
|            | TN5 | 90.33±2.31     | 75.67±4.16 | 74.67±0.58 | 97±7.21       | 93±3.61    | 95.33±3.79 | 91.67±9.5      | 91.33±2.08  | 87.33±4.16 |

**Table S12.** The average soil organic matter content in different growth stage (n=3).

| Treatments |     | Jointing stage |           |           | Silking stage |           |           | Maturing stage |            |           |
|------------|-----|----------------|-----------|-----------|---------------|-----------|-----------|----------------|------------|-----------|
|            |     | 0-20 cm        | 20-40 cm  | 40-60 cm  | 0-20 cm       | 20-40 cm  | 40-60 cm  | 0-20 cm        | 20-40 cm   | 40-60 cm  |
| 2021       | CK  | 10.5±0.26      | 7.7±0.64  | 7.54±0.52 | 11.02±0.1     | 8.29±1.18 | 6.34±0.46 | 6.08±1.67      | 5.85±0.44  | 5.93±0.87 |
|            | N1  | 11.26±1.57     | 7.97±0.65 | 6.85±0.88 | 10.51±0.17    | 8.09±0.39 | 6.9±0.27  | 7.47±0.87      | 7.7±0.85   | 7.65±0.19 |
|            | N2  | 10.5±0.77      | 7.52±0.88 | 6.71±0.68 | 10±0.93       | 8.22±0.43 | 7.39±0.47 | 8.33±0.87      | 6.57±0.23  | 7.67±0.85 |
|            | N3  | 8.92±0.52      | 7.68±0.21 | 7.72±0.38 | 11.39±0.6     | 8.38±0.05 | 7.11±0.34 | 7.56±0.92      | 5.67±0.51  | 6.16±0.3  |
|            | N4  | 10.13±0.28     | 7.4±0.81  | 6.57±0.77 | 12.31±1.03    | 9.18±0.34 | 6.98±0.08 | 9.01±0.89      | 7.14±0.3   | 8.11±0.23 |
|            | N5  | 8.8±0.12       | 8.15±0.8  | 5.96±0.65 | 10.48±0.06    | 8.33±0.41 | 7.85±0.66 | 7.35±1.02      | 7.21±0.37  | 6.25±0.78 |
|            | TN1 | 9.46±0.07      | 7.64±0.21 | 6.28±0.32 | 11.16±0.44    | 8.29±0.73 | 7.47±0.31 | 6.53±1.46      | 7.01±0.97  | 6.44±0.22 |
|            | TN2 | 9.25±0.24      | 7.45±0.31 | 7.58±1.92 | 11.22±0.6     | 9.58±0.27 | 8.59±0.12 | 6.27±0.31      | 6.33±1.38  | 5.92±0.78 |
|            | TN3 | 8.85±0.3       | 6.98±0.3  | 7.03±0.49 | 12.11±0.5     | 9.89±0.41 | 8.35±1.05 | 6.87±0.75      | 5.48±0.3   | 6.39±0.76 |
|            | TN4 | 8.43±0.48      | 6.92±0.61 | 6.15±0.26 | 11.21±0.24    | 8.81±0.12 | 8.14±0.79 | 7.96±0.55      | 6.49±0.3   | 6.63±0.07 |
|            | TN5 | 9.63±0.9       | 7.79±0.33 | 7.04±1    | 12.6±0.89     | 9.38±0.37 | 9.01±0.08 | 8.3±0.15       | 8.65±0.6   | 7.66±0.4  |
| 2022       | CK  | 11.75±1.77     | 7.06±0.76 | 7.51±0.29 | 9.94±0.68     | 6.53±0.12 | 6.2±0.08  | 6.78±1.29      | 8.44±0.17  | 7.44±0.54 |
|            | N1  | 12.04±1.97     | 6.8±0.26  | 6.65±1.12 | 9.57±0.42     | 7.92±0.38 | 7.48±1.01 | 6.52±0.16      | 8.94±0.68  | 8.1±0.64  |
|            | N2  | 12.72±0.88     | 6.72±0.64 | 6.28±0.23 | 9.87±0.52     | 8.02±0.16 | 7.3±0.41  | 7.7±1.42       | 10.01±0.51 | 8.97±0.56 |
|            | N3  | 9.85±0.44      | 7.32±0.48 | 8.38±0.43 | 10.62±0.1     | 7.23±0.36 | 6.62±0.48 | 5.5±0.4        | 8.8±0.16   | 8.5±1.13  |
|            | N4  | 11.55±0.9      | 8.05±1.44 | 6.93±1.62 | 11.08±0.05    | 6.72±1.38 | 6.84±0.46 | 7.57±0.47      | 6.8±1.72   | 8.41±1.45 |
|            | N5  | 9.44±0.22      | 6.63±0.37 | 6.02±0.24 | 9.56±0.25     | 7.93±0.28 | 7.72±1.07 | 7.33±0.55      | 9.18±1.04  | 8.03±0.84 |
|            | TN1 | 10.55±0.83     | 6.86±0.31 | 6.28±0.25 | 9.13±0.22     | 8.38±0.44 | 8.43±0.68 | 7.06±0.7       | 9.65±0.19  | 8.21±0.36 |
|            | TN2 | 10.66±1.24     | 7.29±0.23 | 8.4±0.53  | 10.9±0.33     | 8.54±0.74 | 7.38±0.87 | 6.46±1.28      | 9.09±0.98  | 8.5±0.32  |
|            | TN3 | 9.38±0.48      | 6.69±0.81 | 7.33±1.18 | 10.66±0.59    | 8.05±0.23 | 7.51±0.12 | 5.8±1.2        | 9±0.27     | 8.07±0.5  |
|            | TN4 | 10.32±0.38     | 5.66±0.47 | 8.1±1.21  | 10.27±0.36    | 8.58±0.23 | 8.33±0.26 | 6.95±0.76      | 9.49±0.13  | 9.56±0.29 |
|            | TN5 | 12.17±1.33     | 6.91±0.74 | 5.99±0.93 | 12.76±0.68    | 8.2±0.09  | 9.55±1.04 | 9.68±0.21      | 10.3±0.9   | 8.57±0.91 |

**Table S13.** The average soil urease activity in different growth stage (n=3).

| Treatments |     | Jointing stage |           |           | Silking stage |           |           | Maturing stage |           |           |
|------------|-----|----------------|-----------|-----------|---------------|-----------|-----------|----------------|-----------|-----------|
|            |     | 0-20 cm        | 20-40 cm  | 40-60 cm  | 0-20 cm       | 20-40 cm  | 40-60 cm  | 0-20 cm        | 20-40 cm  | 40-60 cm  |
| 2021       | CK  | 1.18±0.05      | 0.99±0.12 | 0.85±0.03 | 1.04±0.03     | 0.59±0.03 | 0.26±0.01 | 1.24±0.02      | 1.01±0.07 | 0.99±0.03 |
|            | N1  | 1.19±0.09      | 0.98±0.15 | 0.85±0.06 | 1.09±0.05     | 0.95±0.03 | 0.85±0.08 | 1.18±0.04      | 1.08±0.06 | 0.97±0.06 |
|            | N2  | 1.03±0.11      | 0.86±0.08 | 0.71±0.02 | 1.19±0.07     | 0.91±0.1  | 0.85±0.09 | 1.22±0.17      | 1.01±0.04 | 0.92±0.06 |
|            | N3  | 1.02±0.14      | 0.81±0.04 | 0.76±0.16 | 1.15±0.11     | 1.02±0.17 | 0.74±0.08 | 1.19±0.11      | 0.9±0.02  | 0.74±0.13 |
|            | N4  | 1.06±0.07      | 0.84±0.04 | 0.72±0.07 | 1.06±0.05     | 0.6±0.03  | 0.28±0.05 | 1.13±0.15      | 0.97±0.08 | 0.69±0.04 |
|            | N5  | 1.13±0.06      | 0.72±0.13 | 0.41±0.05 | 1.26±0.06     | 0.91±0.07 | 0.94±0.07 | 1.13±0.09      | 0.62±0.18 | 0.49±0.04 |
|            | TN1 | 1.25±0.09      | 0.95±0.11 | 0.85±0.04 | 1.32±0.06     | 0.81±0.11 | 0.86±0.09 | 1.21±0.13      | 0.89±0.06 | 0.84±0.04 |
|            | TN2 | 1.16±0.06      | 0.83±0.11 | 0.73±0.09 | 1.24±0.06     | 0.86±0.06 | 0.83±0.07 | 1.25±0.03      | 0.98±0.04 | 0.78±0.06 |
|            | TN3 | 1.25±0.05      | 0.94±0.07 | 0.74±0.13 | 1.27±0.05     | 0.95±0.05 | 0.45±0.03 | 1.21±0.05      | 0.94±0.09 | 1.02±0.03 |
|            | TN4 | 1.23±0.07      | 0.71±0.08 | 0.86±0.1  | 1.14±0.04     | 1.02±0.06 | 0.9±0.03  | 1.18±0.13      | 0.99±0.05 | 0.83±0.08 |
|            | TN5 | 1.19±0.06      | 0.9±0.04  | 0.89±0.03 | 1.22±0.04     | 1.02±0.07 | 0.89±0.02 | 1.25±0.04      | 1.09±0.04 | 1.02±0.07 |
| 2022       | CK  | 1.1±0.05       | 0.91±0.12 | 0.77±0.03 | 1.04±0.1      | 0.59±0.07 | 0.26±0.08 | 1.23±0.07      | 1±0.12    | 0.98±0.12 |
|            | N1  | 1.13±0.09      | 0.92±0.15 | 0.79±0.06 | 1.08±0.04     | 0.95±0.1  | 0.85±0.17 | 1.18±0.08      | 1.08±0.03 | 0.97±0.04 |
|            | N2  | 1±0.11         | 0.83±0.08 | 0.68±0.02 | 1.19±0.14     | 0.91±0.13 | 0.85±0.08 | 1.22±0.08      | 1.01±0.06 | 0.92±0.15 |
|            | N3  | 1±0.14         | 0.79±0.04 | 0.74±0.16 | 1.15±0.08     | 1.02±0.09 | 0.74±0.07 | 1.12±0.08      | 0.89±0.1  | 0.74±0.2  |
|            | N4  | 0.99±0.07      | 0.77±0.04 | 0.65±0.07 | 1.05±0.14     | 0.59±0.06 | 0.27±0.06 | 1.19±0.15      | 0.97±0.1  | 0.68±0.05 |
|            | N5  | 1.21±0.06      | 0.8±0.13  | 0.49±0.05 | 1.26±0.1      | 0.91±0.16 | 0.93±0.12 | 1.13±0.13      | 0.62±0.2  | 0.49±0.07 |
|            | TN1 | 1.18±0.1       | 0.98±0.07 | 0.83±0.1  | 1.29±0.07     | 0.81±0.12 | 0.86±0.07 | 1.14±0.11      | 0.89±0.12 | 0.83±0.05 |
|            | TN2 | 1.19±0.06      | 0.86±0.11 | 0.76±0.09 | 1.24±0.14     | 0.86±0.09 | 0.82±0.13 | 1.25±0.07      | 0.98±0.13 | 0.78±0.09 |
|            | TN3 | 1.27±0.05      | 0.96±0.07 | 0.76±0.13 | 1.27±0.12     | 0.95±0.12 | 0.45±0.08 | 1.2±0.12       | 0.93±0    | 1.01±0.11 |
|            | TN4 | 1.3±0.07       | 0.78±0.08 | 0.93±0.1  | 1.14±0.05     | 1.01±0.03 | 0.9±0.11  | 1.17±0.07      | 0.99±0.14 | 0.82±0.15 |
|            | TN5 | 1.27±0.06      | 0.98±0.04 | 0.97±0.03 | 1.22±0.11     | 1.01±0.15 | 0.88±0.09 | 1.24±0.1       | 1.08±0.1  | 1.02±0.16 |

**Table S14.** The average soil catalase activity in different growth stage (n=3).

| Treatments |     | Jointing stage |           |           | Silking stage |           |           | Maturing stage |           |           |
|------------|-----|----------------|-----------|-----------|---------------|-----------|-----------|----------------|-----------|-----------|
|            |     | 0-20 cm        | 20-40 cm  | 40-60 cm  | 0-20 cm       | 20-40 cm  | 40-60 cm  | 0-20 cm        | 20-40 cm  | 40-60 cm  |
| 2021       | CK  | 6.17±0.18      | 5.51±0.21 | 6±0.18    | 5.58±0.73     | 5.54±0.07 | 5.71±0.14 | 6.46±0.03      | 6.79±0.23 | 6.68±0.18 |
|            | N1  | 5.84±0.34      | 5.58±0.09 | 5.23±0.18 | 6.02±0.3      | 5.4±0.28  | 6.01±0.43 | 7.24±0.2       | 7.21±0.39 | 6.83±0.14 |
|            | N2  | 6.16±0.42      | 6.01±0.26 | 5.43±0.37 | 5.25±0.11     | 5.81±0.07 | 5.67±0.38 | 6.65±0.06      | 6.8±0.29  | 6.83±0.27 |
|            | N3  | 6.07±0.11      | 5.56±0.15 | 5.57±0.17 | 5.43±0.08     | 5.51±0.44 | 5.93±0.3  | 6.77±0.13      | 7.04±0.25 | 6.91±0.09 |
|            | N4  | 6.6±0.78       | 5.92±0.51 | 6.72±1.15 | 5.85±0.32     | 6.14±0.25 | 5.83±0.57 | 6.7±0.24       | 6.68±0.12 | 6.8±0.04  |
|            | N5  | 6.83±0.17      | 5.44±0.34 | 5.15±0.58 | 6.12±0.55     | 6.23±0.22 | 6.82±0.46 | 7.25±0.27      | 7.42±0.31 | 7.54±0.41 |
|            | TN1 | 5.87±0.2       | 5.85±0.24 | 6.25±0.25 | 7.31±0.64     | 6.75±0.28 | 5.98±0.19 | 6.68±0.07      | 6.54±0.36 | 6.7±0.36  |
|            | TN2 | 6.35±0.44      | 5.42±0.15 | 6.27±0.3  | 5.83±0.14     | 6.94±0.14 | 7.97±0.53 | 7.5±0.14       | 7.26±0.18 | 7.03±0.39 |
|            | TN3 | 6.21±0.36      | 5.77±0.63 | 6.42±0.61 | 6.4±0.36      | 6.84±0.3  | 7.82±0.11 | 6.72±0.04      | 7.1±0.05  | 7.45±0.14 |
|            | TN4 | 6.92±0.08      | 6.52±0.2  | 5.32±0.37 | 7.65±0.54     | 8.1±0.71  | 7.24±0.56 | 8.1±0.34       | 8.05±0.7  | 7.72±0.41 |
|            | TN5 | 6.99±0.38      | 6.61±0.33 | 7.77±0.39 | 8.38±0.42     | 8.14±0.42 | 8.21±0.45 | 7.25±0.32      | 7.92±0.18 | 7.64±0.15 |
| 2022       | CK  | 6.15±0.13      | 5.49±0.27 | 5.98±0.18 | 5.56±0.73     | 5.52±0.14 | 5.69±0.13 | 6.44±0.1       | 6.77±0.15 | 6.67±0.18 |
|            | N1  | 5.82±0.4       | 5.56±0.02 | 5.21±0.18 | 6±0.37        | 5.38±0.21 | 5.99±0.44 | 7.22±0.17      | 7.19±0.34 | 6.81±0.03 |
|            | N2  | 6.14±0.49      | 5.99±0.34 | 5.41±0.44 | 5.23±0.12     | 5.79±0.15 | 5.65±0.42 | 6.64±0.15      | 6.78±0.28 | 6.81±0.28 |
|            | N3  | 6.05±0.18      | 5.54±0.09 | 5.55±0.19 | 5.41±0.15     | 5.49±0.48 | 5.91±0.35 | 6.75±0.06      | 7.03±0.36 | 6.9±0.06  |
|            | N4  | 6.58±0.71      | 5.9±0.45  | 6.7±1.09  | 5.83±0.39     | 6.12±0.3  | 5.81±0.58 | 6.69±0.2       | 6.67±0.21 | 6.78±0.1  |
|            | N5  | 6.81±0.16      | 5.42±0.41 | 5.13±0.63 | 6.1±0.48      | 6.21±0.19 | 6.8±0.41  | 7.23±0.34      | 7.41±0.27 | 7.53±0.38 |
|            | TN1 | 5.85±0.14      | 5.83±0.22 | 6.23±0.18 | 7.29±0.61     | 6.73±0.26 | 5.96±0.23 | 6.66±0.08      | 6.52±0.34 | 6.68±0.25 |
|            | TN2 | 6.33±0.42      | 5.4±0.12  | 6.25±0.29 | 5.81±0.09     | 6.92±0.06 | 7.95±0.6  | 7.48±0.17      | 7.25±0.23 | 7.02±0.3  |
|            | TN3 | 6.19±0.38      | 5.75±0.57 | 6.4±0.54  | 6.38±0.34     | 6.82±0.36 | 7.8±0.05  | 6.7±0.1        | 7.09±0.15 | 7.44±0.25 |
|            | TN4 | 6.9±0.03       | 6.5±0.13  | 5.3±0.43  | 7.63±0.61     | 8.08±0.73 | 7.22±0.63 | 8.08±0.45      | 8.03±0.77 | 7.7±0.48  |
|            | TN5 | 6.97±0.39      | 6.59±0.34 | 7.75±0.43 | 8.36±0.44     | 8.12±0.38 | 8.19±0.47 | 7.24±0.37      | 7.9±0.13  | 7.62±0.17 |

**Table S15.** The average soil sucrase activity in different growth stage (n=3).

| Treatments |     | Jointing stage |            |            | Silking stage |            |            | Maturing stage |            |            |
|------------|-----|----------------|------------|------------|---------------|------------|------------|----------------|------------|------------|
|            |     | 0-20 cm        | 20-40 cm   | 40-60 cm   | 0-20 cm       | 20-40 cm   | 40-60 cm   | 0-20 cm        | 20-40 cm   | 40-60 cm   |
| 2021       | CK  | 11.6±0.55      | 7.59±1.47  | 6.31±0.47  | 8.4±1.1       | 4.43±0.52  | 3.9±0.93   | 7.85±0.43      | 7.62±0.41  | 5.61±0.44  |
|            | N1  | 12.32±0.4      | 7.96±0.11  | 5.48±1.62  | 8.64±1.14     | 5.35±0.18  | 4.67±0.92  | 11.16±0.9      | 7.35±1.66  | 7.27±0.75  |
|            | N2  | 15.45±3.9      | 6.63±0.87  | 4.97±1.33  | 8.46±0.44     | 5.59±0.51  | 4.65±0.44  | 10.86±1.53     | 8.41±0.85  | 8.15±0.66  |
|            | N3  | 20.3±1.22      | 7.02±1.06  | 8.28±1.31  | 9.16±0.35     | 6.09±0.57  | 4.73±0.59  | 11.2±0.14      | 7.92±0.59  | 8.07±0.77  |
|            | N4  | 17.72±2.01     | 13.22±4.52 | 5.26±0.37  | 8.77±0.3      | 5.36±0.32  | 6.84±1.12  | 11.04±1.1      | 9.69±1.22  | 8.9±0.86   |
|            | N5  | 26.05±7.36     | 14.47±3.93 | 7.09±1.09  | 7.57±0.87     | 7.17±1.01  | 10.13±1.16 | 12.44±2.73     | 8.24±0.04  | 8.03±0.43  |
|            | TN1 | 13.96±4.02     | 6.96±0.46  | 5.01±0.28  | 8.89±1.4      | 10.43±1.59 | 9.23±0.64  | 10.67±2.09     | 8.45±0.18  | 5.87±0.34  |
|            | TN2 | 23.61±5.84     | 9.01±1.24  | 8.49±1.21  | 10.7±0.56     | 9.2±0.91   | 9.12±1.08  | 11.32±0.87     | 9.68±1.95  | 8.21±0.82  |
|            | TN3 | 20.26±4.54     | 9.57±0.96  | 5.5±0.34   | 9.6±0.98      | 8.12±1.04  | 8.83±1.07  | 13.33±0.61     | 11.64±2.52 | 12.03±3.75 |
|            | TN4 | 18.57±3.5      | 12.87±0.58 | 7.95±0.83  | 11.24±1.42    | 7.73±0.63  | 10.65±1.47 | 12.34±3.97     | 11.31±2.1  | 12±2.31    |
|            | TN5 | 25.02±7.15     | 11.28±1.52 | 10.65±0.64 | 10.95±1.83    | 9.13±0.54  | 8.87±0.2   | 14.71±1.14     | 9.41±0.75  | 10.13±0.59 |
| 2022       | CK  | 11.9±1.67      | 7.32±2.71  | 6.61±1.2   | 8.7±2.39      | 4.73±1.78  | 5.2±0.92   | 8.15±1.52      | 7.92±1.75  | 5.91±1.86  |
|            | N1  | 20.6±2.85      | 7.89±0.18  | 5.78±1.84  | 8.94±2.75     | 5.65±1.8   | 4.97±1.34  | 11.46±1.95     | 7.65±1.38  | 7.57±1.78  |
|            | N2  | 18.02±3.65     | 8.26±1.55  | 5.27±2.4   | 8.76±1.68     | 5.89±1.59  | 4.95±1.28  | 11.16±3        | 8.71±2.49  | 8.45±1.32  |
|            | N3  | 26.35±8.58     | 9.31±2.3   | 8.58±1.19  | 9.46±1.78     | 6.39±2.18  | 5.03±1.37  | 11.5±1.78      | 8.22±1.13  | 8.37±2.32  |
|            | N4  | 12.62±1.27     | 13.52±5.75 | 5.56±1.96  | 9.07±1.35     | 5.66±1.62  | 7.14±1.65  | 11.34±2.1      | 9.99±2.65  | 9.2±0.8    |
|            | N5  | 15.75±2.42     | 14.77±4.07 | 7.39±1.76  | 7.87±2.45     | 7.47±2.35  | 10.43±2.67 | 12.74±2.31     | 8.54±1.67  | 8.33±1.29  |
|            | TN1 | 14.26±4.89     | 6.93±2.05  | 5.31±1.82  | 9.19±2.62     | 10.73±0.38 | 9.53±2.22  | 10.97±3.67     | 8.75±1.61  | 6.17±1.55  |
|            | TN2 | 23.91±4.2      | 7.26±1.37  | 5.8±1.87   | 11±1.17       | 9.5±2.55   | 9.42±2.6   | 11.62±1.74     | 9.98±1.6   | 8.51±2.2   |
|            | TN3 | 20.56±3.22     | 9.87±2.6   | 8.25±2.16  | 9.9±2.6       | 8.42±0.7   | 9.13±1.52  | 13.63±1.35     | 11.94±3.51 | 12.33±4.76 |
|            | TN4 | 18.87±4.6      | 13.17±1.59 | 10.95±2.26 | 11.54±0.99    | 8.03±1.81  | 10.95±1.68 | 12.64±5        | 11.61±3.22 | 12.3±3.37  |
|            | TN5 | 25.32±8.46     | 11.58±1.8  | 8.79±2.45  | 11.25±3.06    | 9.43±1.14  | 9.17±1.66  | 15.01±1.92     | 9.71±1.08  | 10.43±1.1  |

**Table S16.** The average soil phosphatase activity in different growth stage (n=3).

| Treatments |     | Jointing stage |           |           | Silking stage |           |           | Maturing stage |           |           |
|------------|-----|----------------|-----------|-----------|---------------|-----------|-----------|----------------|-----------|-----------|
|            |     | 0-20 cm        | 20-40 cm  | 40-60 cm  | 0-20 cm       | 20-40 cm  | 40-60 cm  | 0-20 cm        | 20-40 cm  | 40-60 cm  |
| 2021       | CK  | 1.51±0.14      | 0.88±0.02 | 0.44±0.05 | 1.15±0.11     | 0.61±0.02 | 0.41±0.05 | 1.3±0.06       | 0.7±0.05  | 0.41±0.11 |
|            | N1  | 1.34±0.02      | 1.06±0.02 | 0.86±0.22 | 1.43±0.04     | 0.7±0.07  | 0.35±0.04 | 1.36±0.08      | 0.51±0.28 | 0.54±0.11 |
|            | N2  | 1.57±0.13      | 1.01±0.02 | 0.69±0.06 | 1.48±0.09     | 0.7±0.08  | 0.68±0.11 | 1.47±0.18      | 0.81±0.06 | 0.63±0.02 |
|            | N3  | 1.72±0.05      | 1±0.05    | 0.78±0.06 | 1.61±0.11     | 0.87±0.03 | 0.76±0.02 | 1.27±0.02      | 0.96±0.02 | 0.79±0.07 |
|            | N4  | 1.44±0.05      | 1.07±0.09 | 1±0.04    | 1.69±0.12     | 1.06±0.13 | 0.8±0.06  | 1.56±0.06      | 0.97±0.07 | 0.81±0.13 |
|            | N5  | 1.64±0.09      | 1.26±0.06 | 0.74±0.08 | 1.59±0.25     | 0.98±0.19 | 0.76±0.02 | 1.52±0.05      | 1.15±0.08 | 0.88±0.08 |
|            | TN1 | 2±0.09         | 1±0.02    | 0.73±0.1  | 1.87±0.39     | 0.82±0.04 | 0.44±0.04 | 1.35±0.13      | 1.17±0.09 | 0.71±0.06 |
|            | TN2 | 1.97±0.22      | 1.06±0.04 | 0.75±0.04 | 1.47±0.05     | 0.99±0.03 | 0.97±0.04 | 1.58±0.1       | 1.07±0.08 | 0.69±0.13 |
|            | TN3 | 1.73±0.05      | 0.93±0.05 | 0.76±0.08 | 1.52±0.09     | 1.08±0.08 | 0.73±0.13 | 1.49±0.09      | 1.16±0.05 | 0.97±0.13 |
|            | TN4 | 1.93±0.08      | 1.19±0.04 | 1.17±0.05 | 1.48±0.12     | 1.16±0.1  | 0.97±0.06 | 1.54±0.06      | 1.11±0.17 | 1.03±0.06 |
|            | TN5 | 2.03±0.3       | 1.35±0.04 | 1.04±0.14 | 1.55±0.12     | 1.04±0.22 | 0.7±0.14  | 1.64±0.09      | 0.85±0.16 | 0.86±0.06 |
| 2022       | CK  | 1.48±0.09      | 0.85±0.13 | 0.41±0.07 | 1.12±0.21     | 0.58±0.12 | 0.38±0.12 | 1.31±0.1       | 0.71±0.17 | 0.42±0.16 |
|            | N1  | 1.31±0.11      | 1.03±0.1  | 0.83±0.31 | 1.4±0.07      | 0.67±0.17 | 0.32±0.12 | 1.37±0.15      | 0.52±0.17 | 0.55±0.08 |
|            | N2  | 1.54±0.18      | 0.98±0.12 | 0.66±0.15 | 1.45±0.11     | 0.67±0.17 | 0.65±0.08 | 1.48±0.14      | 0.82±0.11 | 0.64±0.1  |
|            | N3  | 1.69±0.06      | 0.97±0.07 | 0.75±0.15 | 1.58±0.13     | 0.84±0.08 | 0.73±0.12 | 1.28±0.1       | 0.97±0.1  | 0.8±0.18  |
|            | N4  | 1.41±0.15      | 1.04±0.11 | 0.97±0.12 | 1.66±0.1      | 1.03±0.06 | 0.77±0.17 | 1.57±0.17      | 0.98±0.11 | 0.82±0.05 |
|            | N5  | 1.61±0.19      | 1.23±0.13 | 0.71±0.06 | 1.56±0.23     | 0.95±0.09 | 0.73±0.11 | 1.53±0.14      | 1.16±0.14 | 0.89±0.06 |
|            | TN1 | 1.97±0.2       | 0.97±0.11 | 0.7±0.02  | 1.84±0.31     | 0.79±0.14 | 0.41±0.12 | 1.36±0.23      | 1.18±0.2  | 0.72±0.18 |
|            | TN2 | 1.94±0.28      | 1.03±0.12 | 0.72±0.14 | 1.44±0.07     | 0.96±0.12 | 0.94±0.14 | 1.59±0.2       | 1.08±0.18 | 0.7±0.11  |
|            | TN3 | 1.7±0.16       | 0.9±0.11  | 0.73±0.12 | 1.49±0.08     | 1.05±0.09 | 0.7±0.02  | 1.5±0.09       | 1.17±0.09 | 0.98±0.08 |
|            | TN4 | 1.9±0.14       | 1.16±0.07 | 1.14±0.07 | 1.45±0.07     | 1.13±0.06 | 0.94±0.06 | 1.55±0.12      | 1.12±0.1  | 1.04±0.17 |
|            | TN5 | 2±0.24         | 1.32±0.09 | 1.01±0.1  | 1.52±0.03     | 1.01±0.21 | 0.67±0.04 | 1.65±0.21      | 0.86±0.25 | 0.87±0.17 |
